# Supplementary material for: Examining the Effector Mechanisms of the Feishu Acupoint (BL13) in the Treatment of Pneumonia Based on Systematic Acupuncture and Moxibustion Research
Source: Hindawi journal article supplement (doi:10.1155/2021/5578104), 2021-07-05
Supplement: f1 [file 5578104.f1.pdf]

| ID         | adj. P. Val | P. Value | logFC     | Gene. symb | Gene. title | Gene. ID |
|------------|-------------|----------|-----------|------------|-------------|----------|
| ILMN_17558 | 4.35E-14    | 9.22E-19 | -2.599154 | SLC26A8    | solute car  | 116369   |
| ILMN_17638 | 4.90E-13    | 2.54E-17 | -1.467432 | MTF1       | metal regu  | 4520     |
| ILMN_17087 | 4.90E-13    | 3.12E-17 | -1.170327 | H2AFJ      | H2A histor  | 55766    |
| ILMN_17908 | 1.45E-12    | 1.23E-16 | -1.581387 | CKAP4      | cytoskelet  | 10970    |
| ILMN_17853 | 2.70E-12    | 2.86E-16 | -3.031115 | GPR84      | G protein-  | 53831    |
| ILMN_16979 | 4.03E-12    | 5.13E-16 | -1.571025 | APOBR      | apolipopro  | 55911    |
| ILMN_22600 | 4.94E-12    | 7.33E-16 | -2.798784 | NAIP       | NLR family  | 4671     |
| ILMN_17229 | 5.79E-12    | 9.83E-16 | -2.006691 | TLR5       | toll like   | 7100     |
| ILMN_17689 | 6.62E-12    | 1.26E-15 | -1.44962  | HIST2H2AC  | histone cl  | 8338     |
| ILMN_18924 | 9.49E-12    | 2.01E-15 | 1.6762653 | SNORD13    | small nucl  | 692084   |
| ILMN_17358 | 9.91E-12    | 2.31E-15 | -1.502876 | KIF1B      | kinesin fe  | 23095    |
| ILMN_16784 | 1.25E-11    | 3.17E-15 | -1.622422 | ZNF438     | zinc finge  | 220929   |
| ILMN_17627 | 1.62E-11    | 4.45E-15 | -2.819599 | MCEMP1     | mast cell   | 199675   |
| ILMN_21267 | 1.73E-11    | 5.46E-15 | -1.6699   | LMNB1      | lamin B1    | 4001     |
| ILMN_16745 | 1.73E-11    | 6.13E-15 | -2.749576 | VNN1       | vanin 1     | 8876     |
| ILMN_22262 | 1.73E-11    | 7.34E-15 | -2.160501 | INSL3      | insulin li  | 3640     |
| ILMN_24158 | 1.73E-11    | 7.71E-15 | -2.203234 | CDK5RAP2   | CDK5 regul  | 55755    |
| ILMN_18124 | 1.73E-11    | 7.65E-15 | -3.856707 | HP         | haptoglobi  | 3240     |
| ILMN_17110 | 1.75E-11    | 8.55E-15 | -2.612016 | OPLAH      | 5-oxoproli  | 26873    |
| ILMN_17430 | 1.84E-11    | 9.37E-15 | -1.83006  | KIF1B      | kinesin fe  | 23095    |
| ILMN_20796 | 2.11E-11    | 1.13E-14 | 1.6236873 | KLRB1      | killer cel  | 3820     |
| ILMN_17658 | 2.62E-11    | 1.57E-14 | -1.322112 | USB1       | U6 snRNA t  | 79650    |
| ILMN_16909 | 3.35E-11    | 2.26E-14 | -1.034845 | ASAP1      | ArfGAP wit  | 50807    |
| ILMN_17757 | 3.35E-11    | 2.28E-14 | -1.270428 | SLC2A3     | solute car  | 6515     |
| ILMN_16813 | 4.21E-11    | 2.95E-14 | -1.81391  | AIM2       | absent in   | 9447     |
| ILMN_32429 | 6.05E-11    | 4.49E-14 | -1.405556 | HIST2H2AA4 | histone cl  | 723790   |
| ILMN_17408 | 7.87E-11    | 6.01E-14 | -2.4067   | TCN2       | transcobal  | 6948     |
| ILMN_16721 | 1.17E-10    | 9.45E-14 | -1.337643 | ECE1       | endothelir  | 1889     |
| ILMN_18104 | 1.24E-10    | 1.02E-13 | -1.808405 | DYSF       | dysferlin   | 8291     |
| ILMN_32388 | 1.35E-10    | 1.15E-13 | -2.153249 | SMA4       | glucuronic  | 11039    |
| ILMN_16590 | 1.55E-10    | 1.44E-13 | -1.390704 | HIST2H2AA3 | histone cl  | 8337     |
| ILMN_17089 | 2.03E-10    | 1.94E-13 | -1.635941 | ADM        | adrenomedu  | 133      |
| ILMN_18034 | 2.21E-10    | 2.16E-13 | -1.341305 | PHTF1      | putative t  | 10745    |
| ILMN_23880 | 2.97E-10    | 3.02E-13 | -2.126808 | MAPK14     | mitogen-ac  | 1432     |
| ILMN_22308 | 3.24E-10    | 3.36E-13 | -1.73545  | GYG1       | glycogenir  | 2992     |
| ILMN_16945 | 3.39E-10    | 3.60E-13 | -2.537783 | ANXA3      | annexin A3  | 306      |
| ILMN_17072 | 3.48E-10    | 3.80E-13 | -1.429878 | PLBD1      | phospholip  | 79887    |
| ILMN_17449 | 3.48E-10    | 3.84E-13 | -1.009572 | ERO1A      | endoplasmic | 30001    |
| ILMN_17698 | 3.66E-10    | 4.11E-13 | -1.03146  | TBC1D2     | TBC1 domai  | 55357    |
| ILMN_16942 | 3.92E-10    | 4.53E-13 | -2.116297 | LILRA6     | leukocyte   | 79168    |
| ILMN_16603 | 3.92E-10    | 4.58E-13 | -1.029502 | LRPAP1     | LDL recept  | 4043     |
| ILMN_16583 | 4.09E-10    | 4.85E-13 | -1.006458 | BAZ1A      | bromodomai  | 11177    |
| ILMN_17988 | 4.24E-10    | 5.12E-13 | -1.224538 | SRPK1      | SRSF prote  | 6732     |
| ILMN_16606 | 4.58E-10    | 5.73E-13 | -1.835697 | LIMK2      | LIM domair  | 3985     |
| ILMN_21760 | 4.63E-10    | 5.89E-13 | -2.309474 | FCGR1A     | Fc fragmer  | 2209     |
| ILMN_17009 | 5.01E-10    | 6.55E-13 | -2.176361 | KREMEN1    | kringle cc  | 83999    |

|            |          |          |           |            |            |        |
|------------|----------|----------|-----------|------------|------------|--------|
| ILMN_23942 | 5.01E-10 | 6.58E-13 | -2.428279 | SLC26A8    | solute car | 116369 |
| ILMN_22665 | 5.19E-10 | 6.99E-13 | -1.149937 | LILRA5     | leukocyte  | 353514 |
| ILMN_17672 | 5.19E-10 | 7.05E-13 | -1.151234 | RRP12      | ribosomal  | 23223  |
| ILMN_21444 | 5.38E-10 | 7.42E-13 | -1.402236 | HIST2H2AA5 | histone cl | 8337   |
| ILMN_16858 | 5.54E-10 | 7.75E-13 | -1.360103 | B4GALT5    | beta-1,4-g | 9334   |
| ILMN_16725 | 7.52E-10 | 1.08E-12 | -2.209115 | SLC26A8    | solute car | 116369 |
| ILMN_16671 | 7.61E-10 | 1.13E-12 | -1.044267 | SQRDL      | sulfide qu | 58472  |
| ILMN_17373 | 8.12E-10 | 1.24E-12 | -1.431564 | BCL6       | B-cell CLI | 604    |
| ILMN_17811 | 1.02E-09 | 1.65E-12 | -1.682174 | MYBPC3     | myosin bir | 4607   |
| ILMN_16640 | 1.02E-09 | 1.60E-12 | -2.888601 | CACNA1E    | calcium vc | 777    |
| ILMN_17027 | 1.02E-09 | 1.67E-12 | -1.263758 | SEMA4A     | semaphorin | 64218  |
| ILMN_17660 | 1.02E-09 | 1.67E-12 | -1.141134 | SH3GLB1    | SH3 domain | 51100  |
| ILMN_16850 | 1.15E-09 | 1.95E-12 | -1.774673 | SLC22A4    | solute car | 6583   |
| ILMN_23641 | 1.34E-09 | 2.34E-12 | -1.044413 | GBA        | glucosylce | 2629   |
| ILMN_17875 | 1.69E-09 | 2.98E-12 | -1.83754  | C3AR1      | complement | 719    |
| ILMN_17175 | 1.77E-09 | 3.16E-12 | -1.443859 | AP5B1      | adaptor re | 91056  |
| ILMN_16542 | 1.99E-09 | 3.58E-12 | -1.171532 | HMGB2      | high mobil | 3148   |
| ILMN_16518 | 2.45E-09 | 4.53E-12 | -1.289139 | BASP1      | brain abur | 10409  |
| ILMN_17016 | 2.50E-09 | 4.73E-12 | -1.865663 | ALPL       | alkaline p | 249    |
| ILMN_17660 | 2.59E-09 | 5.05E-12 | -1.242041 | ABCA1      | ATP bindir | 19     |
| ILMN_17551 | 2.74E-09 | 5.47E-12 | -1.102962 | GBA        | glucosylce | 2629   |
| ILMN_17475 | 2.84E-09 | 5.79E-12 | -2.4516   | HIST2H2AB  | histone cl | 317772 |
| ILMN_18136 | 2.96E-09 | 6.09E-12 | -1.218017 | TRIM25     | tripartite | 7706   |
| ILMN_17726 | 3.01E-09 | 6.32E-12 | -2.449319 | KREMEN1    | kringle co | 83999  |
| ILMN_18122 | 3.11E-09 | 6.66E-12 | -3.204693 | ARG1       | arginase 1 | 383    |
| ILMN_20928 | 3.11E-09 | 6.67E-12 | -1.713841 | HPSE       | heparanase | 10855  |
| ILMN_20509 | 3.21E-09 | 7.03E-12 | -1.653    | SLC22A4    | solute car | 6583   |
| ILMN_22616 | 3.21E-09 | 7.09E-12 | -2.055988 | FCGR1B     | Fc fragmer | 2210   |
| ILMN_17304 | 3.24E-09 | 7.22E-12 | -2.1165   | FOLR3      | folate rec | 2352   |
| ILMN_17265 | 3.31E-09 | 7.50E-12 | -1.770289 | LILRA5     | leukocyte  | 353514 |
| ILMN_16693 | 3.43E-09 | 7.94E-12 | -1.367961 | DRAM1      | DNA damage | 55332  |
| ILMN_17334 | 3.70E-09 | 8.64E-12 | -1.604839 | SULT1B1    | sulfotrans | 27284  |
| ILMN_17472 | 3.90E-09 | 9.27E-12 | -1.467789 | LTB4R      | leukotrier | 1241   |
| ILMN_22683 | 4.08E-09 | 1.00E-11 | -1.091741 | RRBP1      | ribosome t | 6238   |
| ILMN_21139 | 4.08E-09 | 1.00E-11 | -1.30799  | TOR1AIP2   | torsin 1A  | 163590 |
| ILMN_16703 | 4.13E-09 | 1.03E-11 | -1.67222  | HK3        | hexokinase | 3101   |
| ILMN_18117 | 4.24E-09 | 1.06E-11 | -1.021398 | GRN        | granulin   | 2896   |
| ILMN_17666 | 4.62E-09 | 1.17E-11 | -1.149228 | STOM       | stomatin   | 2040   |
| ILMN_17810 | 4.66E-09 | 1.19E-11 | -2.129556 | SOCS3      | suppressor | 9021   |
| ILMN_17601 | 4.76E-09 | 1.22E-11 | -2.296929 | NAIP       | NLR family | 4671   |
| ILMN_16791 | 4.97E-09 | 1.30E-11 | -1.263622 | SERPINB1   | serpin fan | 1992   |
| ILMN_17707 | 5.40E-09 | 1.44E-11 | -1.240628 | DDAH2      | dimethylar | 23564  |
| ILMN_17963 | 5.88E-09 | 1.61E-11 | -2.367294 | MMP9       | matrix met | 4318   |
| ILMN_17375 | 6.35E-09 | 1.79E-11 | -1.022588 | N4BP2L2    | NEDD4 binc | 10443  |
| ILMN_17644 | 6.35E-09 | 1.78E-11 | -1.940829 | TECPR2     | tectonin t | 9895   |
| ILMN_23676 | 6.39E-09 | 1.81E-11 | -1.52613  | LIMK2      | LIM domain | 3985   |
| ILMN_17276 | 7.34E-09 | 2.10E-11 | -1.364412 | SSH1       | slingshot  | 54434  |

|            |          |          |           |           |            |        |
|------------|----------|----------|-----------|-----------|------------|--------|
| ILMN_21237 | 1.13E-08 | 3.47E-11 | -1.151217 | FCER1G    | Fc fragmer | 2207   |
| ILMN_17338 | 1.17E-08 | 3.61E-11 | -1.050072 | ARHGEF11  | Rho guanir | 9826   |
| ILMN_23574 | 1.31E-08 | 4.15E-11 | -1.737169 | LILRA5    | leukocyte  | 353514 |
| ILMN_17982 | 1.34E-08 | 4.32E-11 | -1.238225 | UPP1      | uridine ph | 7378   |
| ILMN_17668 | 1.34E-08 | 4.33E-11 | -3.214835 | ZDHC19    | zinc fing  | 131540 |
| ILMN_16879 | 1.37E-08 | 4.45E-11 | -1.728375 | LIMK2     | LIM domair | 3985   |
| ILMN_17857 | 1.52E-08 | 4.98E-11 | -1.536229 | TNFAIP6   | TNF alpha  | 7130   |
| ILMN_23640 | 1.55E-08 | 5.14E-11 | -1.092336 | SLC16A3   | solute car | 9123   |
| ILMN_17287 | 1.62E-08 | 5.42E-11 | -1.035041 | IL17RA    | interleuki | 23765  |
| ILMN_23910 | 1.65E-08 | 5.55E-11 | -2.066555 | FCGR1B    | Fc fragmer | 2210   |
| ILMN_23676 | 1.71E-08 | 5.83E-11 | -1.444445 | CAMKK2    | calcium/ca | 10645  |
| ILMN_17430 | 1.76E-08 | 6.10E-11 | -1.329184 | CAMKK2    | calcium/ca | 10645  |
| ILMN_18613 | 1.76E-08 | 6.12E-11 | -1.098548 | PLXDC2    | plexin don | 84898  |
| ILMN_17696 | 1.76E-08 | 6.13E-11 | -1.629113 | PIWIL4    | piwi like  | 143689 |
| ILMN_18024 | 1.82E-08 | 6.49E-11 | -1.068089 | AGTRAP    | angiotensi | 57085  |
| ILMN_17969 | 1.85E-08 | 6.68E-11 | -1.787035 | NLRC4     | NLR family | 58484  |
| ILMN_17901 | 1.96E-08 | 7.09E-11 | -1.320966 | DDIAS     | DNA damage | 220042 |
| ILMN_32516 | 2.04E-08 | 7.46E-11 | -1.711959 | LILRA6    | leukocyte  | 79168  |
| ILMN_23190 | 2.49E-08 | 9.36E-11 | 1.3474965 | MATK      | megakaryoc | 4145   |
| ILMN_17569 | 2.52E-08 | 9.55E-11 | -1.219706 | MUC1      | mucin 1, c | 4582   |
| ILMN_18057 | 2.56E-08 | 9.75E-11 | -1.921692 | IFITM3    | interferon | 10410  |
| ILMN_17795 | 2.89E-08 | 1.13E-10 | -1.439401 | HPSE      | heparanase | 10855  |
| ILMN_17376 | 2.89E-08 | 1.14E-10 | -1.511638 | MAPK14    | mitogen-ac | 1432   |
| ILMN_16936 | 3.01E-08 | 1.19E-10 | -1.120588 | VPS9D1    | VPS9 domai | 9605   |
| ILMN_17748 | 3.25E-08 | 1.32E-10 | -1.292053 | IL1RN     | interleuki | 3557   |
| ILMN_17489 | 3.29E-08 | 1.35E-10 | -1.943075 | S100A12   | S100 calci | 6283   |
| ILMN_17501 | 3.50E-08 | 1.45E-10 | -1.109219 | S100A11   | S100 calci | 6282   |
| ILMN_16591 | 3.58E-08 | 1.49E-10 | -1.354369 | LOC146880 | Rho GTPase | 146880 |
| ILMN_21694 | 3.95E-08 | 1.70E-10 | -2.312991 | TDRD9     | tudor doma | 122402 |
| ILMN_18111 | 4.21E-08 | 1.85E-10 | -2.383898 | TDRD9     | tudor doma | 122402 |
| ILMN_23076 | 4.43E-08 | 1.97E-10 | -1.004052 | AGTRAP    | angiotensi | 57085  |
| ILMN_32340 | 4.43E-08 | 1.97E-10 | -1.019261 | N4BP2L2   | NEDD4 binc | 10443  |
| ILMN_32156 | 4.68E-08 | 2.10E-10 | -1.707008 | LINC00265 | long inter | 349114 |
| ILMN_16906 | 4.76E-08 | 2.15E-10 | -1.04513  | SLC9A8    | solute car | 23315  |
| ILMN_17317 | 4.97E-08 | 2.28E-10 | -1.355335 | CREB5     | cAMP respo | 9586   |
| ILMN_23674 | 5.53E-08 | 2.63E-10 | -1.178084 | OSCAR     | osteoclast | 126014 |
| ILMN_21244 | 5.53E-08 | 2.64E-10 | -1.320975 | SLC36A1   | solute car | 206358 |
| ILMN_17073 | 5.53E-08 | 2.65E-10 | -1.229768 | NFIL3     | nuclear fa | 4783   |
| ILMN_20627 | 6.16E-08 | 2.98E-10 | 1.6927768 | PTGDR     | prostaglar | 5729   |
| ILMN_17811 | 6.57E-08 | 3.27E-10 | -1.006731 | PPP1R3D   | protein ph | 5509   |
| ILMN_16901 | 6.66E-08 | 3.33E-10 | -1.161491 | PDLIM7    | PDZ and LI | 9260   |
| ILMN_18730 | 7.01E-08 | 3.52E-10 | 1.1477325 | TNRC6C    | trinucleot | 57690  |
| ILMN_18115 | 7.60E-08 | 3.85E-10 | -1.671073 | HOMER3    | homer scaf | 9454   |
| ILMN_17402 | 9.11E-08 | 4.75E-10 | -1.693514 | SIGLEC5   | sialic aci | 8778   |
| ILMN_16616 | 9.35E-08 | 4.96E-10 | -1.569502 | IRAK3     | interleuki | 11213  |
| ILMN_17838 | 1.04E-07 | 5.58E-10 | -1.050226 | MIIP      | migration  | 60672  |
| ILMN_19025 | 1.05E-07 | 5.69E-10 | -1.399544 | LOC285147 | uncharacte | 285147 |

|            |          |          |           |           |            |        |
|------------|----------|----------|-----------|-----------|------------|--------|
| ILMN_17395 | 1.06E-07 | 5.75E-10 | 1.1199044 | TNRC6A    | trinucleot | 27327  |
| ILMN_17710 | 1.15E-07 | 6.27E-10 | -1.139016 | HAUS4     | HAUS augmi | 54930  |
| ILMN_22029 | 1.16E-07 | 6.37E-10 | -1.233154 | FAR2      | fatty acyl | 55711  |
| ILMN_16664 | 1.18E-07 | 6.50E-10 | -1.127019 | STK3      | serine/thr | 6788   |
| ILMN_18088 | 1.20E-07 | 6.69E-10 | -1.074859 | SBN02     | strawberry | 22904  |
| ILMN_17661 | 1.22E-07 | 6.81E-10 | -1.410012 | BCAT1     | branched c | 586    |
| ILMN_32439 | 1.24E-07 | 6.98E-10 | -1.169617 | DDX60L    | DEAD-box h | 91351  |
| ILMN_17178 | 1.24E-07 | 7.03E-10 | -1.170781 | RNF24     | ring finge | 11237  |
| ILMN_17114 | 1.25E-07 | 7.11E-10 | -1.2462   | ARHGAP26  | Rho GTPase | 23092  |
| ILMN_17211 | 1.64E-07 | 9.74E-10 | -1.528827 | HIST1H3D  | histone cl | 8351   |
| ILMN_17221 | 1.67E-07 | 9.94E-10 | -2.584718 | CASP5     | caspase 5  | 838    |
| ILMN_16634 | 1.67E-07 | 1.00E-09 | -1.304441 | RGL4      | ral guanir | 266747 |
| ILMN_17485 | 1.73E-07 | 1.07E-09 | -1.161133 | CXCL14    | C-X-C moti | 9547   |
| ILMN_17332 | 1.78E-07 | 1.11E-09 | -1.003312 | C1RL      | complement | 51279  |
| ILMN_17092 | 1.87E-07 | 1.18E-09 | -1.611178 | F5        | coagulatic | 2153   |
| ILMN_17635 | 1.90E-07 | 1.21E-09 | 2.3398288 | CCR3      | C-C motif  | 1232   |
| ILMN_32454 | 1.98E-07 | 1.28E-09 | 1.0023624 | SNORA61   | small nucl | 677838 |
| ILMN_17242 | 1.98E-07 | 1.28E-09 | -1.030392 | GRN       | granulin   | 2896   |
| ILMN_20750 | 1.98E-07 | 1.28E-09 | -1.33067  | PGS1      | phosphatic | 9489   |
| ILMN_17385 | 2.06E-07 | 1.36E-09 | -2.139902 | SLC1A3    | solute car | 6507   |
| ILMN_16844 | 2.06E-07 | 1.37E-09 | -1.00425  | PXN       | paxillin   | 5829   |
| ILMN_16884 | 2.08E-07 | 1.38E-09 | 2.6079194 | FCER1A    | Fc fragmer | 2205   |
| ILMN_17265 | 2.09E-07 | 1.39E-09 | -1.037821 | CARD16    | caspase re | 114769 |
| ILMN_16559 | 2.14E-07 | 1.43E-09 | -1.390759 | CDK5RAP2  | CDK5 regul | 55755  |
| ILMN_23091 | 2.30E-07 | 1.58E-09 | -1.344023 | SMARCD3   | SWI/SNF re | 6604   |
| ILMN_17146 | 2.53E-07 | 1.78E-09 | -1.922748 | MGAM      | maltase-gl | 8972   |
| ILMN_16598 | 2.54E-07 | 1.80E-09 | -1.03602  | DNAJC3    | DnaJ heat  | 5611   |
| ILMN_17941 | 2.63E-07 | 1.89E-09 | -1.145532 | PGD       | phosphoglu | 5226   |
| ILMN_17150 | 2.64E-07 | 1.90E-09 | -1.082083 | AQP9      | aquaporin  | 366    |
| ILMN_17906 | 3.25E-07 | 2.43E-09 | -1.236944 | CRISPLD2  | cysteine r | 83716  |
| ILMN_32443 | 3.36E-07 | 2.53E-09 | -1.175951 | ASAP1-IT1 | ASAP1 intr | 29065  |
| ILMN_17524 | 3.37E-07 | 2.57E-09 | 1.1277846 | DHRS3     | dehydroger | 9249   |
| ILMN_17659 | 3.37E-07 | 2.57E-09 | -1.743429 | ADGRG3    | adhesion C | 222487 |
| ILMN_24092 | 3.37E-07 | 2.57E-09 | -1.372606 | CCPG1     | cell cycle | 9236   |
| ILMN_21176 | 3.49E-07 | 2.72E-09 | -1.228621 | PLXNC1    | plexin C1  | 10154  |
| ILMN_17740 | 3.58E-07 | 2.81E-09 | -4.477252 | CD177     | CD177 mole | 57126  |
| ILMN_16961 | 3.61E-07 | 2.84E-09 | -1.311588 | PYGL      | phosphoryl | 5836   |
| ILMN_21860 | 3.62E-07 | 2.86E-09 | -1.51095  | PFKFB3    | 6-phosphof | 5209   |
| ILMN_22045 | 3.71E-07 | 2.98E-09 | -1.374639 | ST3GAL4   | ST3 beta-g | 6484   |
| ILMN_17848 | 4.12E-07 | 3.37E-09 | -1.006018 | LILRB3    | leukocyte  | 11025  |
| ILMN_16898 | 4.21E-07 | 3.47E-09 | -1.014528 | C5AR1     | complement | 728    |
| ILMN_17070 | 4.34E-07 | 3.60E-09 | -1.267853 | SORT1     | sortilin l | 6272   |
| ILMN_16850 | 4.34E-07 | 3.63E-09 | -1.121893 | ITGAM     | integrin s | 3684   |
| ILMN_17329 | 4.65E-07 | 3.95E-09 | -1.520165 | SIPA1L2   | signal inc | 57568  |
| ILMN_16933 | 4.71E-07 | 4.03E-09 | -1.859966 | CYP1B1    | cytochrome | 1545   |
| ILMN_17504 | 4.78E-07 | 4.13E-09 | -1.119496 | MKNK1     | MAP kinase | 8569   |
| ILMN_16996 | 4.97E-07 | 4.34E-09 | 1.9259245 | TNFRSF21  | TNF recept | 27242  |

|            |          |          |           |           |            |        |
|------------|----------|----------|-----------|-----------|------------|--------|
| ILMN_16563 | 5.08E-07 | 4.46E-09 | -1.274343 | GLT1D1    | glycosyltr | 144423 |
| ILMN_16583 | 5.21E-07 | 4.60E-09 | 1.2981605 | KLRG1     | killer cel | 10219  |
| ILMN_16512 | 5.23E-07 | 4.64E-09 | -2.448379 | COL17A1   | collagen t | 1308   |
| ILMN_16688 | 5.38E-07 | 4.79E-09 | -1.755679 | SLC2A14   | solute car | 144195 |
| ILMN_17943 | 5.63E-07 | 5.05E-09 | 1.3225137 | CTSW      | cathepsin  | 1521   |
| ILMN_17804 | 6.19E-07 | 5.65E-09 | -1.863952 | CLEC5A    | C-type lec | 23601  |
| ILMN_17625 | 6.35E-07 | 5.86E-09 | -1.043427 | C9orf72   | chromosome | 203228 |
| ILMN_20444 | 8.09E-07 | 7.64E-09 | 1.6611351 | NCR3      | natural cy | 259197 |
| ILMN_23975 | 8.17E-07 | 7.74E-09 | -1.088589 | KDM6B     | lysine den | 23135  |
| ILMN_17766 | 8.67E-07 | 8.32E-09 | -1.35164  | RNASE4    | ribonuclea | 6038   |
| ILMN_23215 | 8.91E-07 | 8.62E-09 | 1.3059317 | P2RY10    | purinergic | 27334  |
| ILMN_16845 | 9.50E-07 | 9.35E-09 | -1.431438 | ACSL1     | acyl-CoA s | 2180   |
| ILMN_17948 | 9.73E-07 | 9.60E-09 | -1.161327 | GPAT3     | glycerol-3 | 84803  |
| ILMN_20557 | 1.00E-06 | 9.97E-09 | 1.6350089 | KLRF1     | killer cel | 51348  |
| ILMN_16514 | 1.00E-06 | 1.01E-08 | -1.297736 | HIST1H2BD | histone cl | 3017   |
| ILMN_22490 | 1.05E-06 | 1.07E-08 | 2.4357673 | LRRC26    | leucine ri | 389816 |
| ILMN_16873 | 1.04E-06 | 1.05E-08 | -1.166121 | VCAN      | versican   | 1462   |
| ILMN_17172 | 1.10E-06 | 1.13E-08 | -1.078415 | C9orf66   | chromosome | 157983 |
| ILMN_24041 | 1.11E-06 | 1.14E-08 | -1.030716 | SERPINA1  | serpin fan | 5265   |
| ILMN_18150 | 1.12E-06 | 1.15E-08 | -1.709705 | ADGRG3    | adhesion C | 222487 |
| ILMN_17254 | 1.12E-06 | 1.16E-08 | 1.3705781 | NELL2     | neural EGF | 4753   |
| ILMN_23717 | 1.12E-06 | 1.17E-08 | -1.605292 | CEACAM1   | carcinoemb | 634    |
| ILMN_17411 | 1.13E-06 | 1.17E-08 | -1.283651 | SLC11A1   | solute car | 6556   |
| ILMN_17774 | 1.25E-06 | 1.32E-08 | -1.596114 | C9orf106  | chromosome | 414318 |
| ILMN_17766 | 1.32E-06 | 1.42E-08 | 1.243332  | SCML1     | sex comb c | 6322   |
| ILMN_16542 | 1.39E-06 | 1.51E-08 | 1.2314315 | CD1C      | CD1c molec | 911    |
| ILMN_16594 | 1.41E-06 | 1.53E-08 | -1.179119 | KIF1B     | kinesin fa | 23095  |
| ILMN_20786 | 1.47E-06 | 1.61E-08 | -1.104904 | ALPK1     | alpha kine | 80216  |
| ILMN_17671 | 1.56E-06 | 1.72E-08 | -1.919973 | CR1       | complement | 1378   |
| ILMN_21692 | 1.56E-06 | 1.73E-08 | -1.280798 | TNNI2     | troponin I | 7136   |
| ILMN_17880 | 1.62E-06 | 1.81E-08 | -1.513477 | MAPK14    | mitogen-ac | 1432   |
| ILMN_16945 | 1.63E-06 | 1.83E-08 | -1.35328  | FAR2      | fatty acyl | 55711  |
| ILMN_16712 | 1.68E-06 | 1.92E-08 | -1.055832 | CLIC4     | chloride i | 25932  |
| ILMN_16755 | 1.69E-06 | 1.94E-08 | -1.26688  | PLPP2     | phospholip | 8612   |
| ILMN_16643 | 1.76E-06 | 2.03E-08 | -1.958991 | CEACAM1   | carcinoemb | 634    |
| ILMN_17426 | 1.81E-06 | 2.10E-08 | -1.613293 | CR1       | complement | 1378   |
| ILMN_17891 | 1.81E-06 | 2.11E-08 | 1.2677185 | TPM2      | tropomyosi | 7169   |
| ILMN_18062 | 1.83E-06 | 2.14E-08 | -1.484911 | LIN7A     | lin-7 homc | 8825   |
| ILMN_19136 | 1.83E-06 | 2.14E-08 | -1.285438 | IRAK3     | interleuki | 11213  |
| ILMN_17966 | 1.84E-06 | 2.17E-08 | -1.007937 | NCF2      | neutrophil | 4688   |
| ILMN_17092 | 1.89E-06 | 2.25E-08 | 1.1989946 | EPHX2     | epoxide hy | 2053   |
| ILMN_16693 | 1.92E-06 | 2.30E-08 | 1.9333478 | MATK      | megakaryoc | 4145   |
| ILMN_16918 | 1.95E-06 | 2.36E-08 | -2.29932  | GOS2      | G0/G1 swit | 50486  |
| ILMN_23010 | 1.94E-06 | 2.33E-08 | -1.259351 | UBE2C     | ubiquitin  | 11065  |
| ILMN_17419 | 1.95E-06 | 2.35E-08 | -1.065725 | OSCAR     | osteoclast | 126014 |
| ILMN_16560 | 1.96E-06 | 2.38E-08 | -1.946294 | NTN3      | netrin 3   | 4917   |
| ILMN_20668 | 2.00E-06 | 2.44E-08 | -1.038625 | TNFSF13B  | tumor necr | 10673  |

|            |          |          |           |           |            |        |
|------------|----------|----------|-----------|-----------|------------|--------|
| ILMN_17420 | 2.05E-06 | 2.51E-08 | 1.9702749 | CD160     | CD160 mole | 11126  |
| ILMN_17937 | 2.11E-06 | 2.61E-08 | -1.033897 | DIRC2     | disrupted  | 84925  |
| ILMN_16607 | 2.15E-06 | 2.67E-08 | 1.7981551 | PPP2R2B   | protein ph | 5521   |
| ILMN_17701 | 2.19E-06 | 2.74E-08 | -1.046759 | BST1      | bone marro | 683    |
| ILMN_21938 | 2.29E-06 | 2.90E-08 | 1.5010499 | MMP23B    | matrix met | 8510   |
| ILMN_16608 | 2.34E-06 | 2.98E-08 | -1.352142 | PFKFB3    | 6-phosphof | 5209   |
| ILMN_21147 | 2.38E-06 | 3.07E-08 | -2.288611 | SLPI      | secretory  | 6590   |
| ILMN_23881 | 2.51E-06 | 3.29E-08 | -1.564626 | CR1       | complement | 1378   |
| ILMN_20538 | 2.51E-06 | 3.30E-08 | -1.078587 | PARP9     | poly(ADP-r | 83666  |
| ILMN_23589 | 2.54E-06 | 3.34E-08 | -1.299367 | TP53I3    | tumor prot | 9540   |
| ILMN_17998 | 2.59E-06 | 3.43E-08 | -2.194926 | ANKRD22   | ankyrin re | 118932 |
| ILMN_18149 | 2.59E-06 | 3.45E-08 | -1.045068 | PDLIM7    | PDZ and LI | 9260   |
| ILMN_16922 | 2.65E-06 | 3.54E-08 | -1.095043 | DOK3      | docking pr | 79930  |
| ILMN_21748 | 2.73E-06 | 3.68E-08 | -1.423979 | HNRNPA3P1 | heterogene | 10151  |
| ILMN_17457 | 2.75E-06 | 3.71E-08 | 1.2571424 | POLL      | polymerase | 27343  |
| ILMN_16602 | 2.77E-06 | 3.76E-08 | -1.227666 | LINC00999 | long inter | 399744 |
| ILMN_16514 | 2.87E-06 | 3.92E-08 | -1.657507 | GADD45G   | growth arr | 10912  |
| ILMN_17081 | 3.08E-06 | 4.25E-08 | -1.367464 | TMEM144   | transmembr | 55314  |
| ILMN_17239 | 3.14E-06 | 4.35E-08 | 1.3378551 | TARP      | TCR gamma  | 445347 |
| ILMN_17459 | 3.17E-06 | 4.40E-08 | -1.189392 | GAS7      | growth arr | 8522   |
| ILMN_17162 | 3.29E-06 | 4.64E-08 | 1.2104501 | CCL4L1    | C-C motif  | 388372 |
| ILMN_17989 | 3.31E-06 | 4.69E-08 | -1.725889 | ADGRG3    | adhesion C | 222487 |
| ILMN_17501 | 3.43E-06 | 4.87E-08 | 1.2228505 | TESC      | tescalcin  | 54997  |
| ILMN_32308 | 3.47E-06 | 4.97E-08 | -1.306954 | LINC00152 | long inter | 112597 |
| ILMN_17808 | 3.46E-06 | 4.95E-08 | -1.04927  | KCNJ2     | potassium  | 3759   |
| ILMN_21594 | 3.48E-06 | 5.00E-08 | -1.059952 | STXBP2    | syntaxin b | 6813   |
| ILMN_17871 | 3.57E-06 | 5.15E-08 | 2.5650231 | NOV       | nephroblas | 4856   |
| ILMN_23932 | 3.53E-06 | 5.08E-08 | -1.226047 | GK        | glycerol k | 2710   |
| ILMN_16908 | 3.57E-06 | 5.17E-08 | 1.2244809 | GZMM      | granzyme M | 3004   |
| ILMN_16848 | 3.60E-06 | 5.21E-08 | -1.267609 | SAMSN1    | SAM domair | 64092  |
| ILMN_18064 | 3.70E-06 | 5.42E-08 | -1.822419 | NTNG2     | netrin G2  | 84628  |
| ILMN_17487 | 3.68E-06 | 5.35E-08 | -1.295805 | CTRC      | chymotryps | 11330  |
| ILMN_17020 | 3.79E-06 | 5.58E-08 | -1.205235 | SV2A      | synaptic v | 9900   |
| ILMN_23867 | 3.84E-06 | 5.70E-08 | 1.7431212 | KLRC3     | killer cel | 3823   |
| ILMN_18131 | 3.86E-06 | 5.74E-08 | -1.033623 | TOM1      | target of  | 10043  |
| ILMN_17306 | 3.91E-06 | 5.82E-08 | -1.413342 | RNASE2    | ribonuclea | 6036   |
| ILMN_18089 | 3.91E-06 | 5.84E-08 | -1.492322 | CLEC4D    | C-type lec | 338339 |
| ILMN_19101 | 3.91E-06 | 5.85E-08 | 1.4780056 | RRN3P1    | RRN3 homol | 730092 |
| ILMN_16858 | 4.18E-06 | 6.29E-08 | 1.6318895 | KLRF1     | killer cel | 51348  |
| ILMN_16757 | 4.21E-06 | 6.34E-08 | -1.216808 | KCNJ15    | potassium  | 3772   |
| ILMN_17398 | 4.49E-06 | 6.83E-08 | -1.422529 | DPRXP4    | divergent- | 503645 |
| ILMN_16951 | 4.52E-06 | 6.88E-08 | -1.657312 | CA4       | carbonic e | 762    |
| ILMN_17028 | 4.74E-06 | 7.22E-08 | 1.1536452 | CD244     | CD244 mole | 51744  |
| ILMN_17608 | 4.78E-06 | 7.32E-08 | 1.2710121 | EOMES     | eomesodern | 8320   |
| ILMN_17068 | 4.83E-06 | 7.41E-08 | -1.057846 | EIF2AK2   | eukaryotic | 5610   |
| ILMN_16559 | 4.99E-06 | 7.72E-08 | -1.326996 | ELL2      | elongation | 22936  |
| ILMN_17991 | 5.24E-06 | 8.15E-08 | 1.4719649 | KLRD1     | killer cel | 3824   |

|            |          |          |           |           |            |        |
|------------|----------|----------|-----------|-----------|------------|--------|
| ILMN_22560 | 5.29E-06 | 8.29E-08 | -1.820729 | SERPINA1  | serpin fan | 5265   |
| ILMN_16718 | 5.48E-06 | 8.62E-08 | 1.2377955 | SEPT1     | septin 1   | 1731   |
| ILMN_17586 | 5.77E-06 | 9.26E-08 | -1.237414 | HIST1H2BD | histone cl | 3017   |
| ILMN_18629 | 5.98E-06 | 9.59E-08 | 1.1539447 | RORA      | RAR relate | 6095   |
| ILMN_17979 | 6.05E-06 | 9.76E-08 | 1.5698221 | KLRD1     | killer cel | 3824   |
| ILMN_23162 | 6.13E-06 | 9.95E-08 | 1.2154872 | HOPX      | HOP homeok | 84525  |
| ILMN_22440 | 6.32E-06 | 1.03E-07 | 1.1404123 | LBH       | limb bud e | 81606  |
| ILMN_17490 | 6.35E-06 | 1.04E-07 | -1.044766 | TIMP2     | TIMP metal | 7077   |
| ILMN_17322 | 6.41E-06 | 1.05E-07 | 1.2841974 | ID3       | inhibitor  | 3399   |
| ILMN_17335 | 6.52E-06 | 1.07E-07 | -1.123925 | LOXL3     | lysyl oxid | 84695  |
| ILMN_17254 | 6.58E-06 | 1.08E-07 | -1.244976 | GK        | glycerol k | 2710   |
| ILMN_16843 | 6.65E-06 | 1.10E-07 | 1.179611  | IL2RB     | interleuki | 3560   |
| ILMN_18120 | 7.80E-06 | 1.33E-07 | 1.2834805 | ABCB1     | ATP bindir | 5243   |
| ILMN_23799 | 7.80E-06 | 1.33E-07 | -1.409989 | FCAR      | Fc fragmer | 2204   |
| ILMN_16864 | 7.83E-06 | 1.34E-07 | -1.091181 | TIFA      | TRAF inter | 92610  |
| ILMN_20731 | 7.97E-06 | 1.37E-07 | 1.8242404 | S1PR5     | sphingosir | 53637  |
| ILMN_20923 | 8.07E-06 | 1.38E-07 | -1.66066  | GPR141    | G protein- | 353345 |
| ILMN_23942 | 8.12E-06 | 1.40E-07 | 1.0256397 | PLEKHA1   | pleckstrir | 59338  |
| ILMN_20620 | 8.30E-06 | 1.44E-07 | -1.134148 | HOOK3     | hook micro | 84376  |
| ILMN_17125 | 8.40E-06 | 1.46E-07 | -2.740079 | CEACAM6   | carcinoemb | 4680   |
| ILMN_17926 | 8.40E-06 | 1.46E-07 | -1.471063 | MCTP2     | multiple C | 55784  |
| ILMN_17012 | 8.48E-06 | 1.48E-07 | 1.4980664 | SH2D1B    | SH2 domair | 117157 |
| ILMN_23707 | 8.65E-06 | 1.51E-07 | -1.036928 | SLC24A4   | solute car | 123041 |
| ILMN_16998 | 8.65E-06 | 1.51E-07 | -1.284588 | ST14      | suppressio | 6768   |
| ILMN_18082 | 8.94E-06 | 1.57E-07 | -2.081349 | PNPLA1    | patatin li | 285848 |
| ILMN_21427 | 9.17E-06 | 1.62E-07 | -1.526277 | MANSC1    | MANSC doma | 54682  |
| ILMN_17647 | 9.23E-06 | 1.63E-07 | 1.0338735 | OXNAD1    | oxidoreduc | 92106  |
| ILMN_17168 | 9.42E-06 | 1.68E-07 | -1.435839 | CEACAM1   | carcinoemb | 634    |
| ILMN_24089 | 9.49E-06 | 1.69E-07 | -1.461652 | SMARCD3   | SWI/SNF re | 6604   |
| ILMN_17048 | 9.51E-06 | 1.70E-07 | -1.601658 | PGLYRP1   | peptidogly | 8993   |
| ILMN_17961 | 9.73E-06 | 1.75E-07 | -1.778055 | BMX       | BMX non-re | 660    |
| ILMN_17115 | 1.08E-05 | 1.96E-07 | 1.1500978 | CD96      | CD96 molec | 10225  |
| ILMN_17706 | 1.12E-05 | 2.05E-07 | 1.3613034 | KLHL3     | kelch like | 26249  |
| ILMN_16913 | 1.14E-05 | 2.10E-07 | -1.369782 | JAG1      | jagged 1   | 182    |
| ILMN_17316 | 1.16E-05 | 2.17E-07 | 1.2666751 | ABLIM1    | actin binc | 3983   |
| ILMN_16964 | 1.19E-05 | 2.22E-07 | -1.142875 | ROPN1L    | rhophilin  | 83853  |
| ILMN_21997 | 1.20E-05 | 2.25E-07 | -1.091411 | SLITRK4   | SLIT and M | 139065 |
| ILMN_17964 | 1.22E-05 | 2.30E-07 | 1.4473529 | CLIC3     | chloride i | 9022   |
| ILMN_17019 | 1.22E-05 | 2.31E-07 | 1.6046577 | DCANP1    | dendritic  | 140947 |
| ILMN_16578 | 1.25E-05 | 2.37E-07 | -1.024648 | TLR8      | toll like  | 51311  |
| ILMN_17345 | 1.26E-05 | 2.39E-07 | 1.1061089 | TC2N      | tandem C2  | 123036 |
| ILMN_17615 | 1.28E-05 | 2.44E-07 | -1.469624 | CYSTM1    | cysteine r | 84418  |
| ILMN_23520 | 1.29E-05 | 2.48E-07 | 1.4945866 | ADGRG1    | adhesion C | 9289   |
| ILMN_17261 | 1.33E-05 | 2.57E-07 | 1.1227319 | SLC45A3   | solute car | 85414  |
| ILMN_16599 | 1.36E-05 | 2.64E-07 | -1.488634 | RSPH9     | radial spo | 221421 |
| ILMN_17172 | 1.38E-05 | 2.70E-07 | -1.124395 | MMP25     | matrix met | 64386  |
| ILMN_16995 | 1.38E-05 | 2.71E-07 | 1.1768064 | PPIAL4C   | peptidylpr | 653598 |

|            |          |          |           |           |             |           |
|------------|----------|----------|-----------|-----------|-------------|-----------|
| ILMN_17952 | 1.47E-05 | 2.92E-07 | -1.087155 | SIGLEC9   | sialic aci  | 27180     |
| ILMN_22898 | 1.47E-05 | 2.93E-07 | -1.030659 | FCGR2A    | Fc fragmer  | 2212      |
| ILMN_16880 | 1.54E-05 | 3.08E-07 | 1.0395837 | TBC1D4    | TBC1 domai  | 9882      |
| ILMN_21932 | 1.57E-05 | 3.14E-07 | -1.974659 | DEFA1     | defensin ε  | 1667      |
| ILMN_23430 | 1.57E-05 | 3.15E-07 | 1.3047991 | NCALD     | neurocalci  | 83988     |
| ILMN_17991 | 1.60E-05 | 3.22E-07 | -1.173083 | MARC1     | mitochondr  | 64757     |
| ILMN_17619 | 1.64E-05 | 3.33E-07 | 1.828765  | FGFBP2    | fibroblast  | 83888     |
| ILMN_17694 | 1.64E-05 | 3.33E-07 | 1.0245249 | TMEM261   | transmembr  | 90871     |
| ILMN_21682 | 1.67E-05 | 3.39E-07 | 1.1798663 | GPR183    | G protein-  | 1880      |
| ILMN_23841 | 1.81E-05 | 3.76E-07 | 1.4951728 | ADGRG1    | adhesion C  | 9289      |
| ILMN_23297 | 1.86E-05 | 3.91E-07 | -1.135248 | ECM1      | extracellu  | 1893      |
| ILMN_16524 | 1.92E-05 | 4.04E-07 | -1.39831  | MANSC1    | MANSC dome  | 54682     |
| ILMN_17129 | 1.92E-05 | 4.05E-07 | -1.231933 | NQO2      | NAD(P)H qu  | 4835      |
| ILMN_16559 | 2.07E-05 | 4.46E-07 | -1.273689 | STAB1     | stabilin 1  | 23166     |
| ILMN_17144 | 2.07E-05 | 4.47E-07 | 1.208528  | KLF12     | Kruppel li  | 11278     |
| ILMN_17452 | 2.11E-05 | 4.57E-07 | -1.435474 | PLSCR1    | phospholip  | 5359      |
| ILMN_32410 | 2.16E-05 | 4.70E-07 | 1.7466602 | MYBL1     | MYB proto-  | 4603      |
| ILMN_17805 | 2.19E-05 | 4.79E-07 | -1.339561 | OSM       | oncostatir  | 5008      |
| ILMN_16798 | 2.21E-05 | 4.82E-07 | -1.279162 | CST7      | cystatin F  | 8530      |
| ILMN_17130 | 2.23E-05 | 4.89E-07 | -1.036157 | PSTPIP2   | proline-se  | 9050      |
| ILMN_17584 | 2.24E-05 | 4.90E-07 | -1.035089 | TNFSF13B  | tumor necr  | 10673     |
| ILMN_18595 | 2.36E-05 | 5.22E-07 | -1.528311 | LOC101930 | luncharacte | 101930164 |
| ILMN_17817 | 2.38E-05 | 5.30E-07 | -1.689553 | IL18R1    | interleuki  | 8809      |
| ILMN_17413 | 2.41E-05 | 5.38E-07 | -1.040774 | B3GNT8    | UDP-GlcNAc  | 374907    |
| ILMN_17261 | 2.41E-05 | 5.39E-07 | -1.198092 | ITGAX     | integrin s  | 3687      |
| ILMN_17638 | 2.47E-05 | 5.52E-07 | -1.168234 | ANPEP     | alanyl ami  | 290       |
| ILMN_16885 | 2.49E-05 | 5.59E-07 | -1.567133 | CAMP      | cathelicid  | 820       |
| ILMN_20522 | 2.50E-05 | 5.62E-07 | -1.240269 | GADD45A   | growth arr  | 1647      |
| ILMN_16621 | 2.60E-05 | 5.89E-07 | 1.0131734 | ZNF248    | zinc finge  | 57209     |
| ILMN_17667 | 2.65E-05 | 6.04E-07 | -2.312137 | BPI       | bactericid  | 671       |
| ILMN_16696 | 2.78E-05 | 6.38E-07 | -1.424898 | GRB10     | growth fac  | 2887      |
| ILMN_17080 | 2.81E-05 | 6.49E-07 | 1.1314076 | PLEKHF1   | pleckstrin  | 79156     |
| ILMN_16568 | 2.97E-05 | 6.92E-07 | -1.776762 | GPR141    | G protein-  | 353345    |
| ILMN_17231 | 3.01E-05 | 7.06E-07 | -1.12632  | CDKN2B    | cyclin dep  | 1030      |
| ILMN_22996 | 3.04E-05 | 7.13E-07 | 1.225798  | TNFRSF25  | TNF recept  | 8718      |
| ILMN_17974 | 3.07E-05 | 7.22E-07 | 1.5652933 | FCRL3     | Fc recepto  | 115352    |
| ILMN_17159 | 3.21E-05 | 7.63E-07 | 1.6861086 | FBX07     | F-box prot  | 25793     |
| ILMN_17201 | 3.28E-05 | 7.81E-07 | -1.039055 | ETS2      | ETS proto-  | 2114      |
| ILMN_18052 | 3.32E-05 | 7.93E-07 | -1.225745 | LRG1      | leucine ri  | 116844    |
| ILMN_16538 | 3.33E-05 | 7.98E-07 | -1.066531 | NAMPT     | nicotinami  | 10135     |
| ILMN_17912 | 3.35E-05 | 8.03E-07 | -1.23513  | FBXL13    | F-box and   | 222235    |
| ILMN_16782 | 3.35E-05 | 8.04E-07 | 1.4408343 | ZNF683    | zinc finge  | 257101    |
| ILMN_18002 | 3.44E-05 | 8.34E-07 | -1.771479 | PPARG     | peroxisome  | 5468      |
| ILMN_16913 | 3.39E-05 | 8.17E-07 | -1.131873 | NME8      | NME/NM23 f  | 51314     |
| ILMN_17122 | 3.52E-05 | 8.60E-07 | -1.408995 | PPP1R3B   | protein ph  | 79660     |
| ILMN_20948 | 3.62E-05 | 8.90E-07 | 1.3213398 | ATCB1     | ATP bindir  | 5243      |
| ILMN_18131 | 3.57E-05 | 8.74E-07 | -1.194076 | ANKDD1A   | ankyrin re  | 348094    |



|            |          |          |           |          |            |        |
|------------|----------|----------|-----------|----------|------------|--------|
| ILMN_17225 | 3.80E-05 | 9.43E-07 | -2.130677 | GALNT14  | polypeptic | 79623  |
| ILMN_17459 | 3.71E-05 | 9.13E-07 | 1.198207  | FBX07    | F-box prot | 25793  |
| ILMN_23426 | 3.75E-05 | 9.27E-07 | -1.323783 | ASGR2    | asialoglyc | 433    |
| ILMN_17357 | 4.00E-05 | 1.01E-06 | -2.598524 | SLC11A1  | solute car | 6556   |
| ILMN_32516 | 4.08E-05 | 1.03E-06 | -4.751646 | CD177    | CD177 mole | 57126  |
| ILMN_22562 | 3.88E-05 | 9.66E-07 | 1.6648718 | GNL1     | granulysin | 10578  |
| ILMN_17540 | 3.90E-05 | 9.75E-07 | 1.7352134 | CACNA2D3 | calcium ve | 55799  |
| ILMN_16679 | 3.91E-05 | 9.76E-07 | -1.045732 | FAM129A  | family wit | 116496 |
| ILMN_17256 | 3.95E-05 | 9.90E-07 | -2.207416 | DEFA1B   | defensin a | 728358 |
| ILMN_22271 | 4.00E-05 | 1.01E-06 | 1.5139364 | CCDC65   | coiled-coi | 85478  |
| ILMN_17978 | 4.01E-05 | 1.01E-06 | -1.033061 | FFAR2    | free fatty | 2867   |
| ILMN_16921 | 4.04E-05 | 1.02E-06 | 1.033653  | GNA12    | G protein  | 2768   |
| ILMN_17977 | 4.21E-05 | 1.08E-06 | 1.8551895 | PRSS23   | protease,  | 11098  |
| ILMN_17164 | 4.40E-05 | 1.13E-06 | -1.49761  | FOXM1    | forkhead b | 2305   |
| ILMN_23580 | 4.24E-05 | 1.08E-06 | -1.162357 | NBN      | nibrin     | 4683   |
| ILMN_23607 | 4.61E-05 | 1.20E-06 | -1.240929 | CAV2     | caveolin 2 | 858    |
| ILMN_17890 | 4.92E-05 | 1.30E-06 | -3.35364  | SLC51A   | solute car | 200931 |
| ILMN_17752 | 4.66E-05 | 1.22E-06 | -1.152043 | PROK2    | prokinetic | 60675  |
| ILMN_16949 | 4.67E-05 | 1.22E-06 | -1.282546 | ASGR2    | asialoglyc | 433    |
| ILMN_20839 | 4.72E-05 | 1.24E-06 | -1.257622 | TGFA     | transformi | 7039   |
| ILMN_17320 | 4.75E-05 | 1.25E-06 | 1.2374089 | DPM2     | dolichyl-p | 8818   |
| ILMN_17576 | 5.06E-05 | 1.34E-06 | 1.318875  | TPM2     | tropomyosi | 7169   |
| ILMN_16786 | 5.12E-05 | 1.37E-06 | -1.535517 | UPB1     | beta-ureic | 51733  |
| ILMN_17813 | 5.17E-05 | 1.39E-06 | -1.306235 | TUFT1    | tuftelin 1 | 7286   |
| ILMN_23551 | 5.30E-05 | 1.43E-06 | -1.056886 | MGST1    | microsomal | 4257   |
| ILMN_17723 | 5.33E-05 | 1.44E-06 | -1.188029 | TLR2     | toll like  | 7097   |
| ILMN_22058 | 5.37E-05 | 1.46E-06 | -1.556676 | NSUN7    | NOP2/Sun F | 79730  |
| ILMN_16766 | 5.43E-05 | 1.48E-06 | -1.151065 | DISC1    | disrupted  | 27185  |
| ILMN_16569 | 5.67E-05 | 1.56E-06 | -2.12278  | TRIM6    | tripartite | 117854 |
| ILMN_23278 | 5.43E-05 | 1.48E-06 | 1.8984121 | IL5RA    | interleuki | 3568   |
| ILMN_32379 | 5.56E-05 | 1.52E-06 | 1.1126533 | CARNS1   | carnosine  | 57571  |
| ILMN_17665 | 5.65E-05 | 1.55E-06 | 1.3383646 | CPA3     | carboxypep | 1359   |
| ILMN_32416 | 5.76E-05 | 1.59E-06 | 1.0934059 | TMEM204  | transmembr | 79652  |
| ILMN_21325 | 5.76E-05 | 1.60E-06 | -1.549638 | ANKRD22  | ankyrin re | 118932 |
| ILMN_17197 | 5.82E-05 | 1.61E-06 | 1.0437378 | ZAP70    | zeta chair | 7535   |
| ILMN_17885 | 5.84E-05 | 1.62E-06 | 1.2340758 | NCALD    | neurocalci | 83988  |
| ILMN_23027 | 5.84E-05 | 1.62E-06 | 1.3472263 | FCGBP    | Fc fragmer | 8857   |
| ILMN_17987 | 6.19E-05 | 1.74E-06 | 1.1409951 | GPR183   | G protein- | 1880   |
| ILMN_18069 | 6.25E-05 | 1.76E-06 | 1.0795553 | CSTF3    | cleavage s | 1479   |
| ILMN_21652 | 6.34E-05 | 1.79E-06 | -2.147023 | DEFA3    | defensin a | 1668   |
| ILMN_24097 | 6.50E-05 | 1.85E-06 | 1.0272151 | PRR5     | proline ri | 55615  |
| ILMN_22677 | 6.53E-05 | 1.86E-06 | 1.0983917 | HPS1     | HPS1, bio  | 3257   |
| ILMN_16768 | 6.76E-05 | 1.93E-06 | -1.06838  | ADCY3    | adenylate  | 109    |
| ILMN_16890 | 6.97E-05 | 2.01E-06 | -1.106298 | RBM47    | RNA bindir | 54502  |
| ILMN_17126 | 7.15E-05 | 2.07E-06 | -1.292944 | FAM20C   | family wit | 56975  |
| ILMN_17284 | 7.24E-05 | 2.11E-06 | -1.034189 | CXCL16   | C-X-C moti | 58191  |
| ILMN_17754 | 7.26E-05 | 2.12E-06 | 1.4001071 | ARL4A    | ADP ribosy | 10124  |

|            |          |          |           |           |            |        |
|------------|----------|----------|-----------|-----------|------------|--------|
| ILMN_17571 | 7.33E-05 | 2.15E-06 | -1.335208 | TMEM88    | transmembr | 92162  |
| ILMN_17805 | 7.60E-05 | 2.25E-06 | 1.1647913 | GPR18     | G protein- | 2841   |
| ILMN_16897 | 7.92E-05 | 2.36E-06 | -1.054078 | IL1RN     | interleuki | 3557   |
| ILMN_18032 | 7.98E-05 | 2.38E-06 | -1.158421 | TMC4      | transmembr | 147798 |
| ILMN_21027 | 8.10E-05 | 2.43E-06 | -2.372872 | DEFA1B    | defensin a | 728358 |
| ILMN_19122 | 8.32E-05 | 2.51E-06 | -1.084343 | SUCNR1    | succinate  | 56670  |
| ILMN_17790 | 8.54E-05 | 2.58E-06 | 1.7236175 | CACNG6    | calcium ve | 59285  |
| ILMN_16988 | 8.50E-05 | 2.57E-06 | -1.431902 | ZAK       | sterile al | 51776  |
| ILMN_17985 | 8.66E-05 | 2.63E-06 | 1.0969359 | ACKR3     | atypical c | 57007  |
| ILMN_16725 | 8.68E-05 | 2.64E-06 | -1.379443 | BMX       | BMX non-re | 660    |
| ILMN_31815 | 9.05E-05 | 2.78E-06 | -1.102045 | C10orf105 | chromosome | 414152 |
| ILMN_17192 | 9.26E-05 | 2.88E-06 | -1.226795 | DISC1     | disrupted  | 27185  |
| ILMN_23829 | 9.15E-05 | 2.83E-06 | 1.2388419 | CCDC7     | coiled-coi | 79741  |
| ILMN_16575 | 9.21E-05 | 2.86E-06 | 1.1057727 | TSEN54    | tRNA splic | 283989 |
| ILMN_16525 | 9.33E-05 | 2.91E-06 | -1.036823 | SIGLEC5   | sialic aci | 8778   |
| ILMN_17156 | 9.66E-05 | 3.03E-06 | 1.3363439 | IL23A     | interleuki | 51561  |
| ILMN_16795 | 9.89E-05 | 3.12E-06 | -2.233789 | DEFA1B    | defensin a | 728358 |
| ILMN_23356 | 1.00E-04 | 3.17E-06 | 1.0656041 | SKAP1     | src kinase | 8631   |
| ILMN_20485 | 1.00E-04 | 3.19E-06 | 1.5163938 | LRRN3     | leucine ri | 54674  |
| ILMN_17411 | 1.01E-04 | 3.22E-06 | 1.0406687 | TXK       | TXK tyrosi | 7294   |
| ILMN_22292 | 1.10E-04 | 3.57E-06 | -1.53947  | SIGLEC16  | sialic aci | 400709 |
| ILMN_33078 | 1.10E-04 | 3.58E-06 | 1.7751288 | CHI3L1    | chitinase  | 1116   |
| ILMN_24135 | 1.13E-04 | 3.68E-06 | 1.8268064 | HEMGN     | hemogen    | 55363  |
| ILMN_17526 | 1.16E-04 | 3.82E-06 | 1.1394716 | KLRC1     | killer cel | 3821   |
| ILMN_16751 | 1.17E-04 | 3.84E-06 | -1.828427 | RETN      | resistin   | 56729  |
| ILMN_17051 | 1.18E-04 | 3.88E-06 | -2.285955 | MPO       | myeloperox | 4353   |
| ILMN_16669 | 1.18E-04 | 3.91E-06 | 1.2196489 | ADGRG5    | adhesion C | 221188 |
| ILMN_17726 | 1.26E-04 | 4.21E-06 | 1.4322057 | NSG1      | neuron spe | 27065  |
| ILMN_17781 | 1.26E-04 | 4.23E-06 | -1.369093 | ZMYND15   | zinc finge | 84225  |
| ILMN_17605 | 1.26E-04 | 4.24E-06 | 1.1568707 | CD8A      | CD8a molec | 925    |
| ILMN_17649 | 1.29E-04 | 4.34E-06 | -1.985165 | SERPINA1  | serpin fan | 5265   |
| ILMN_20747 | 1.33E-04 | 4.50E-06 | 1.6840558 | FCRL6     | Fc recepto | 343413 |
| ILMN_18048 | 1.31E-04 | 4.40E-06 | -1.168705 | LSMEM1    | leucine ri | 286006 |
| ILMN_16574 | 1.34E-04 | 4.53E-06 | -1.15692  | CEACAM4   | carcinoemb | 1089   |
| ILMN_16958 | 1.38E-04 | 4.71E-06 | 1.3524558 | KRT72     | keratin 72 | 140807 |
| ILMN_32431 | 1.39E-04 | 4.75E-06 | 1.65413   | ADGRE4P   | adhesion C | 326342 |
| ILMN_17516 | 1.39E-04 | 4.75E-06 | 1.3526141 | FOSB      | FosB protc | 2354   |
| ILMN_16792 | 1.39E-04 | 4.78E-06 | 1.8363721 | TGM2      | transgluta | 7052   |
| ILMN_17018 | 1.39E-04 | 4.78E-06 | -1.157417 | KLHL2     | kelch like | 11275  |
| ILMN_17217 | 1.43E-04 | 4.93E-06 | -1.235283 | IL18RAP   | interleuki | 8807   |
| ILMN_16974 | 1.47E-04 | 5.07E-06 | 1.0917579 | PRR5L     | proline ri | 79899  |
| ILMN_16614 | 1.55E-04 | 5.39E-06 | -1.065677 | ATP11C    | ATPase pho | 286410 |
| ILMN_17500 | 1.55E-04 | 5.43E-06 | 1.1744806 | CD200R1   | CD200 rece | 131450 |
| ILMN_23969 | 1.56E-04 | 5.47E-06 | -1.165487 | KCNJ15    | potassium  | 3772   |
| ILMN_24126 | 1.57E-04 | 5.53E-06 | -1.058038 | TP53I11   | tumor prot | 9537   |
| ILMN_16990 | 1.60E-04 | 5.65E-06 | 1.0459183 | MAP3K7CL  | MAP3K7 C-t | 56911  |
| ILMN_17819 | 1.60E-04 | 5.67E-06 | -1.346471 | MGST1     | microsomal | 4257   |

|            |          |          |           |            |            |           |
|------------|----------|----------|-----------|------------|------------|-----------|
| ILMN_23436 | 1.60E-04 | 5.67E-06 | 1.2630269 | SAMD3      | sterile al | 154075    |
| ILMN_23841 | 1.70E-04 | 6.11E-06 | 1.6148399 | KLRC1      | killer cel | 3821      |
| ILMN_17736 | 1.68E-04 | 6.00E-06 | 1.3254562 | LRRN3      | leucine ri | 54674     |
| ILMN_17107 | 1.71E-04 | 6.16E-06 | 1.1478828 | GZMK       | granzyme f | 3003      |
| ILMN_17643 | 1.73E-04 | 6.24E-06 | -1.173217 | HDAC4      | histone de | 9759      |
| ILMN_17818 | 1.79E-04 | 6.49E-06 | 1.7266887 | FASLG      | Fas ligand | 356       |
| ILMN_16600 | 1.80E-04 | 6.57E-06 | 1.0115056 | PRR5       | proline ri | 55615     |
| ILMN_17679 | 1.83E-04 | 6.67E-06 | -1.455791 | NSUN7      | NOP2/Sun F | 79730     |
| ILMN_23031 | 1.89E-04 | 6.94E-06 | 1.2795194 | MBNL3      | muscleblir | 55796     |
| ILMN_18122 | 2.05E-04 | 7.63E-06 | 1.1666471 | LY9        | lymphocyte | 4063      |
| ILMN_17511 | 2.18E-04 | 8.28E-06 | -1.371205 | COL7A1     | collagen t | 1294      |
| ILMN_22521 | 2.20E-04 | 8.39E-06 | -1.439208 | UBC        | ubiquitin  | 7316      |
| ILMN_17382 | 2.10E-04 | 7.88E-06 | -1.254152 | TREML3P    | triggering | 340206    |
| ILMN_17312 | 2.11E-04 | 7.92E-06 | 1.3518956 | GZMH       | granzyme f | 2999      |
| ILMN_17536 | 2.14E-04 | 8.08E-06 | 1.0507971 | TRIM51     | tripartite | 84767     |
| ILMN_16853 | 2.16E-04 | 8.18E-06 | -1.095845 | PSG3       | pregnancy  | 5671      |
| ILMN_17062 | 2.19E-04 | 8.32E-06 | 1.6308005 | PTGDR      | prostaglar | 5729      |
| ILMN_23224 | 2.22E-04 | 8.44E-06 | 1.063121  | RORA       | RAR relate | 6095      |
| ILMN_16779 | 2.25E-04 | 8.57E-06 | -2.249104 | LTF        | lactotrans | 4057      |
| ILMN_17923 | 2.30E-04 | 8.80E-06 | 1.6919032 | HDC        | histidine  | 3067      |
| ILMN_17490 | 2.36E-04 | 9.09E-06 | 1.0839637 | HLA-DPB1   | major hist | 3115      |
| ILMN_23795 | 2.42E-04 | 9.36E-06 | -1.345765 | CD163      | CD163 mole | 9332      |
| ILMN_16631 | 2.46E-04 | 9.49E-06 | -1.101964 | DSC2       | desmocolli | 1824      |
| ILMN_32502 | 2.56E-04 | 9.98E-06 | -1.416523 | ACVRL1     | activin A  | 94        |
| ILMN_17712 | 2.54E-04 | 9.85E-06 | -1.245094 | SKA1       | spindle ar | 220134    |
| ILMN_16940 | 2.56E-04 | 9.96E-06 | -1.039973 | GADD45A    | growth arr | 1647      |
| ILMN_17661 | 2.58E-04 | 1.00E-05 | 1.3111699 | FHIT       | fragile hi | 2272      |
| ILMN_23732 | 2.95E-04 | 1.19E-05 | -2.460406 | MSR1       | macrophage | 4481      |
| ILMN_16548 | 2.67E-04 | 1.05E-05 | 1.7044445 | CLC        | Charcot-Le | 1178      |
| ILMN_23840 | 2.80E-04 | 1.12E-05 | -2.048534 | GPB1       | G protein- | 2852      |
| ILMN_17449 | 2.72E-04 | 1.08E-05 | 1.6067652 | RHOBTB3    | Rho relate | 22836     |
| ILMN_16995 | 2.77E-04 | 1.10E-05 | 1.2678266 | FCRL3      | Fc recepto | 115352    |
| ILMN_17183 | 2.83E-04 | 1.13E-05 | -1.025533 | NECTIN2    | nectin cel | 5819      |
| ILMN_23383 | 2.88E-04 | 1.15E-05 | 1.0817164 | UBASH3A    | ubiquitin  | 53347     |
| ILMN_17226 | 2.94E-04 | 1.18E-05 | -1.275876 | CD163      | CD163 mole | 9332      |
| ILMN_21431 | 3.05E-04 | 1.24E-05 | -1.819867 | KIF11      | kinesin fa | 3832      |
| ILMN_17395 | 3.27E-04 | 1.35E-05 | -1.425224 | CYB5R2     | cytochrome | 51700     |
| ILMN_17964 | 3.27E-04 | 1.35E-05 | -2.297493 | C1QB       | complement | 713       |
| ILMN_17936 | 3.11E-04 | 1.26E-05 | 1.0178317 | SERPINA10  | serpin fan | 51156     |
| ILMN_16586 | 3.16E-04 | 1.29E-05 | 1.1269222 | DTX3       | deltex E3  | 196403    |
| ILMN_17204 | 3.58E-04 | 1.52E-05 | -2.637548 | LONRF3     | LON peptic | 79836     |
| ILMN_23841 | 3.23E-04 | 1.32E-05 | 1.7127725 | KLRC1      | killer cel | 3821      |
| ILMN_17286 | 3.23E-04 | 1.33E-05 | -1.073482 | CREB5      | cAMP respc | 9586      |
| ILMN_32478 | 3.28E-04 | 1.35E-05 | 1.1967786 | PCED1B-AS1 | PCED1B ant | 100233209 |
| ILMN_16800 | 3.28E-04 | 1.36E-05 | 1.9947866 | HEMGN      | hemogen    | 55363     |
| ILMN_24006 | 3.31E-04 | 1.37E-05 | 1.0156998 | ZNF626     | zinc finge | 199777    |
| ILMN_17810 | 3.64E-04 | 1.55E-05 | -2.148223 | SYN2       | synapsin I | 6854      |

|            |          |          |           |          |            |        |
|------------|----------|----------|-----------|----------|------------|--------|
| ILMN_17319 | 3.38E-04 | 1.41E-05 | 1.0875488 | LY9      | lymphocyte | 4063   |
| ILMN_16956 | 3.53E-04 | 1.49E-05 | -1.62339  | KIF20A   | kinesin fa | 10112  |
| ILMN_17063 | 3.64E-04 | 1.55E-05 | -1.690801 | RFX2     | regulatory | 5990   |
| ILMN_16580 | 3.92E-04 | 1.72E-05 | -1.766663 | CENPI    | centromere | 2491   |
| ILMN_16721 | 3.61E-04 | 1.54E-05 | 1.2981097 | KRT73    | keratin 73 | 319101 |
| ILMN_17799 | 3.64E-04 | 1.56E-05 | 1.0201936 | AK1      | adenylate  | 203    |
| ILMN_17995 | 3.69E-04 | 1.58E-05 | 1.3717623 | NOXA1    | NADPH oxid | 10811  |
| ILMN_17515 | 3.72E-04 | 1.60E-05 | 1.013135  | TMEM204  | transmembr | 79652  |
| ILMN_16902 | 3.83E-04 | 1.66E-05 | 1.7248404 | CNTNAP2  | contactin  | 26047  |
| ILMN_17514 | 4.24E-04 | 1.89E-05 | -2.557843 | NEDD4    | neural pre | 4734   |
| ILMN_17406 | 3.77E-04 | 1.63E-05 | 1.0751071 | PRF1     | perforin 1 | 5551   |
| ILMN_16644 | 3.88E-04 | 1.69E-05 | 1.6135001 | PTGDS    | prostaglar | 5730   |
| ILMN_16720 | 3.88E-04 | 1.69E-05 | 1.0645736 | EPHA4    | EPH recept | 2043   |
| ILMN_17066 | 3.91E-04 | 1.71E-05 | -2.255674 | ELANE    | elastase,  | 1991   |
| ILMN_20647 | 4.32E-04 | 1.93E-05 | -2.359015 | METTL7B  | methyltrar | 196410 |
| ILMN_22914 | 3.99E-04 | 1.76E-05 | 1.3372082 | FAM102A  | family wit | 399665 |
| ILMN_17705 | 4.03E-04 | 1.78E-05 | 1.0440039 | BEX3     | brain expr | 27018  |
| ILMN_17016 | 4.07E-04 | 1.80E-05 | -1.021654 | SCO2     | SCO2 cytoc | 9997   |
| ILMN_17033 | 4.24E-04 | 1.89E-05 | 1.8444184 | PTGDR2   | prostaglar | 11251  |
| ILMN_18080 | 4.47E-04 | 2.01E-05 | -1.089354 | KIF14    | kinesin fa | 9928   |
| ILMN_21250 | 4.70E-04 | 2.13E-05 | 1.2297429 | TIGIT    | T-cell imm | 201633 |
| ILMN_23838 | 4.78E-04 | 2.18E-05 | 1.1292325 | ZNF74    | zinc finge | 7625   |
| ILMN_21168 | 5.53E-04 | 2.58E-05 | -3.482899 | OLFM4    | olfactomec | 10562  |
| ILMN_16796 | 5.07E-04 | 2.33E-05 | -1.031453 | EXOC6    | exocyst co | 54536  |
| ILMN_17085 | 5.02E-04 | 2.30E-05 | 1.6327785 | PDZK1IP1 | PDZK1 inte | 10158  |
| ILMN_17861 | 5.07E-04 | 2.33E-05 | -1.102847 | CCNA2    | cyclin A2  | 890    |
| ILMN_16580 | 5.10E-04 | 2.35E-05 | 1.1015155 | ZNF831   | zinc finge | 128611 |
| ILMN_22588 | 5.12E-04 | 2.36E-05 | 1.0269393 | SAMD3    | sterile al | 154075 |
| ILMN_17275 | 5.44E-04 | 2.53E-05 | 1.9534122 | OLIG2    | oligodendr | 10215  |
| ILMN_22346 | 6.09E-04 | 2.89E-05 | -3.039436 | BEX1     | brain expr | 55859  |
| ILMN_16996 | 5.39E-04 | 2.50E-05 | -1.007646 | ZNF516   | zinc finge | 9658   |
| ILMN_16560 | 5.53E-04 | 2.58E-05 | -1.223031 | PLAU     | plasminoge | 5328   |
| ILMN_23795 | 5.44E-04 | 2.53E-05 | 1.1729348 | HAGH     | hydroxyacy | 3029   |
| ILMN_17767 | 5.54E-04 | 2.59E-05 | 1.3000492 | PARP15   | poly(ADP-r | 165631 |
| ILMN_17486 | 5.70E-04 | 2.67E-05 | 1.3184034 | CD8B     | CD8b molec | 926    |
| ILMN_17110 | 6.44E-04 | 3.10E-05 | -2.156331 | CDC25A   | cell divis | 993    |
| ILMN_17569 | 5.90E-04 | 2.78E-05 | 1.1540521 | RTN1     | reticulon  | 6252   |
| ILMN_17582 | 6.38E-04 | 3.07E-05 | -1.692606 | QSOX1    | quiescin s | 5768   |
| ILMN_23521 | 6.06E-04 | 2.87E-05 | 1.2510139 | ERBB2    | erb-b2 rec | 2064   |
| ILMN_17576 | 6.83E-04 | 3.34E-05 | -1.865691 | NEIL3    | nei like I | 55247  |
| ILMN_17420 | 6.30E-04 | 3.02E-05 | 1.0168426 | PYHIN1   | pyrin and  | 149628 |
| ILMN_23541 | 6.37E-04 | 3.06E-05 | 1.2076902 | CD8B     | CD8b molec | 926    |
| ILMN_16689 | 6.66E-04 | 3.24E-05 | 1.3392277 | SPNS3    | sphingolip | 201305 |
| ILMN_22958 | 6.73E-04 | 3.28E-05 | 1.0208763 | NGDN     | neuroguidi | 25983  |
| ILMN_17253 | 6.79E-04 | 3.32E-05 | 1.0618556 | SLC27A5  | solute car | 10998  |
| ILMN_16708 | 6.99E-04 | 3.44E-05 | 1.0588971 | OPN3     | opsin 3    | 23596  |
| ILMN_20491 | 7.13E-04 | 3.52E-05 | 1.5572954 | DNASE1L3 | deoxyribor | 1776   |

|            |          |          |           |          |             |        |
|------------|----------|----------|-----------|----------|-------------|--------|
| ILMN_17052 | 7.19E-04 | 3.56E-05 | -1.173462 | TMEM110  | transmembr  | 375346 |
| ILMN_16914 | 7.38E-04 | 3.67E-05 | -1.355628 | BAMBI    | BMP and ac  | 25805  |
| ILMN_17990 | 7.39E-04 | 3.68E-05 | 1.3419264 | TSPAN5   | tetraspani  | 10098  |
| ILMN_17405 | 7.75E-04 | 3.90E-05 | 1.0063971 | TMSB15B  | thymosin b  | 286527 |
| ILMN_18060 | 7.97E-04 | 4.04E-05 | -2.490911 | CEACAM8  | carcinoemb  | 1088   |
| ILMN_17040 | 9.17E-04 | 4.77E-05 | -2.057263 | OGFOD2   | 2-oxogluta  | 79676  |
| ILMN_17965 | 7.94E-04 | 4.01E-05 | -1.049832 | SMPDL3A  | sphingomye  | 10924  |
| ILMN_16818 | 8.17E-04 | 4.15E-05 | 1.1634915 | ZNF540   | zinc finge  | 163255 |
| ILMN_17991 | 9.67E-04 | 5.08E-05 | -3.444353 | COL17A1  | collagen t  | 1308   |
| ILMN_21639 | 7.72E-04 | 3.88E-05 | -4.440877 | OXGR1    | oxoglutaric | 27199  |
| ILMN_17008 | 8.58E-04 | 4.40E-05 | -1.46813  | SLC27A2  | solute car  | 11001  |
| ILMN_17011 | 8.30E-04 | 4.23E-05 | 1.5474541 | PLA2G7   | phospholip  | 7941   |
| ILMN_17451 | 8.30E-04 | 4.23E-05 | 1.0123812 | FAM102A  | family wit  | 399665 |
| ILMN_22514 | 9.17E-04 | 4.77E-05 | -1.872238 | RPS6KA1  | ribosomal   | 6195   |
| ILMN_17979 | 8.42E-04 | 4.30E-05 | 1.140012  | EXTL2    | exostosin   | 2135   |
| ILMN_17160 | 8.85E-04 | 4.57E-05 | 1.6526711 | MYL4     | myosin lig  | 4635   |
| ILMN_32372 | 1.04E-03 | 5.54E-05 | -2.712752 | USP17L29 | ubiquitin   | 728405 |
| ILMN_16737 | 8.71E-04 | 4.48E-05 | 1.1052351 | KCNG1    | potassium   | 3755   |
| ILMN_17089 | 9.08E-04 | 4.71E-05 | 1.3322009 | PDZD4    | PDZ domair  | 57595  |
| ILMN_20678 | 9.51E-04 | 4.98E-05 | -1.109    | SLC30A1  | solute car  | 7779   |
| ILMN_17984 | 9.60E-04 | 5.03E-05 | -1.271562 | KAZN     | kazrin, pe  | 23254  |
| ILMN_32349 | 1.11E-03 | 6.04E-05 | -3.410533 | SNORD105 | small nucl  | 692229 |
| ILMN_17829 | 9.80E-04 | 5.16E-05 | 1.426214  | SLC16A10 | solute car  | 117247 |
| ILMN_23302 | 1.17E-03 | 6.41E-05 | -2.288377 | CUX1     | cut like f  | 1523   |
| ILMN_18050 | 1.03E-03 | 5.50E-05 | -1.334823 | PDE1B    | phosphodie  | 5153   |
| ILMN_17244 | 9.93E-04 | 5.25E-05 | 1.0411497 | AXIN2    | axin 2      | 8313   |
| ILMN_16834 | 9.96E-04 | 5.27E-05 | -1.230569 | CDCA5    | cell divis  | 113130 |
| ILMN_22487 | 1.00E-03 | 5.33E-05 | 1.1115495 | TYSND1   | trypsin dc  | 219743 |
| ILMN_16514 | 1.15E-03 | 6.30E-05 | -1.90372  | LILRA6   | leukocyte   | 79168  |
| ILMN_23292 | 1.03E-03 | 5.51E-05 | 1.46162   | TRIM10   | tripartite  | 10107  |
| ILMN_17925 | 1.04E-03 | 5.56E-05 | 1.1786604 | RNF165   | ring finge  | 494470 |
| ILMN_17790 | 1.04E-03 | 5.61E-05 | 1.5588009 | FEZ1     | fasciculat  | 9638   |
| ILMN_21982 | 1.07E-03 | 5.76E-05 | 1.0447089 | HGD      | homogentis  | 3081   |
| ILMN_17535 | 1.08E-03 | 5.86E-05 | -2.318388 | DEFA4    | defensin a  | 1669   |
| ILMN_20476 | 1.39E-03 | 7.95E-05 | -2.632178 | KCNE1    | potassium   | 3753   |
| ILMN_21131 | 1.19E-03 | 6.53E-05 | -1.614603 | RNASE3   | ribonuclea  | 6037   |
| ILMN_17511 | 1.19E-03 | 6.57E-05 | -1.12851  | HIST1H4H | histone cl  | 8365   |
| ILMN_17080 | 1.22E-03 | 6.77E-05 | 1.2335947 | TMEM8B   | transmembr  | 51754  |
| ILMN_16694 | 1.22E-03 | 6.77E-05 | 1.0933721 | PYHIN1   | pyrin and   | 149628 |
| ILMN_17435 | 1.22E-03 | 6.81E-05 | 1.3073482 | DLL1     | delta like  | 28514  |
| ILMN_17105 | 1.26E-03 | 7.03E-05 | 1.7462481 | TTC25    | tetratricc  | 83538  |
| ILMN_16748 | 1.25E-03 | 6.96E-05 | -1.19735  | OASL     | 2'-5'-olig  | 8638   |
| ILMN_24075 | 1.27E-03 | 7.13E-05 | -1.151902 | RNF135   | ring finge  | 84282  |
| ILMN_17936 | 1.43E-03 | 8.26E-05 | -1.522553 | TUBA8    | tubulin al  | 51807  |
| ILMN_17417 | 1.57E-03 | 9.31E-05 | -2.299598 | MS4A4A   | membrane s  | 51338  |
| ILMN_32020 | 1.44E-03 | 8.33E-05 | -2.021562 | ECRP     | ribonuclea  | 643332 |
| ILMN_32351 | 1.51E-03 | 8.81E-05 | -2.053443 | BICDL2   | BICD famil  | 146439 |

|            |          |          |           |           |            |           |
|------------|----------|----------|-----------|-----------|------------|-----------|
| ILMN_17228 | 1.38E-03 | 7.83E-05 | 1.42289   | NRCAM     | neuronal c | 4897      |
| ILMN_17052 | 1.39E-03 | 7.98E-05 | 1.3329331 | MYBPH     | myosin bir | 4608      |
| ILMN_32449 | 1.45E-03 | 8.40E-05 | -1.358139 | SNORA78   | small nucl | 677844    |
| ILMN_32489 | 1.40E-03 | 8.02E-05 | 1.1039762 | MIR155HG  | MIR155 hos | 114614    |
| ILMN_17005 | 1.48E-03 | 8.60E-05 | -1.659969 | C7orf34   | chromosome | 135927    |
| ILMN_23952 | 1.41E-03 | 8.08E-05 | 1.1344272 | FMNL3     | formin lik | 91010     |
| ILMN_17639 | 1.42E-03 | 8.17E-05 | -1.336394 | CENPW     | centromere | 387103    |
| ILMN_18480 | 1.44E-03 | 8.30E-05 | 1.3608035 | IKZF2     | IKAROS fan | 22807     |
| ILMN_21757 | 1.75E-03 | 1.06E-04 | 2.2398547 | KIR2DS3   | killer cel | 3808      |
| ILMN_22966 | 1.52E-03 | 8.92E-05 | -1.135579 | C9orf72   | chromosome | 203228    |
| ILMN_16646 | 1.82E-03 | 1.11E-04 | -2.047276 | ARMCX3    | armadillo  | 51566     |
| ILMN_31813 | 1.49E-03 | 8.70E-05 | -1.474333 | MRVI1-AS1 | MRVI1 anti | 100129827 |
| ILMN_17135 | 1.50E-03 | 8.73E-05 | 1.000039  | LGR6      | leucine ri | 59352     |
| ILMN_18146 | 1.51E-03 | 8.83E-05 | 1.1378428 | ZC3H12B   | zinc finge | 340554    |
| ILMN_16809 | 1.59E-03 | 9.44E-05 | -2.031852 | PTPN20    | protein ty | 26095     |
| ILMN_17370 | 1.51E-03 | 8.84E-05 | 1.0583192 | CAPN5     | calpain 5  | 726       |
| ILMN_24138 | 1.62E-03 | 9.64E-05 | -1.323676 | MCM10     | minichromc | 55388     |
| ILMN_16892 | 1.61E-03 | 9.60E-05 | 1.1378207 | SNORD14D  | small nucl | 85390     |
| ILMN_17610 | 1.76E-03 | 1.06E-04 | 1.5460591 | B3GAT1    | beta-1,3-g | 27087     |
| ILMN_21296 | 1.70E-03 | 1.02E-04 | -1.097927 | RAB27B    | RAB27B, me | 5874      |
| ILMN_17671 | 1.64E-03 | 9.79E-05 | 1.2627818 | CAMK4     | calcium/ca | 814       |
| ILMN_17588 | 1.66E-03 | 9.96E-05 | -1.094813 | ENTPD7    | ectonuclec | 57089     |
| ILMN_17127 | 1.80E-03 | 1.09E-04 | -1.45918  | ZNF608    | zinc finge | 57507     |
| ILMN_33084 | 2.03E-03 | 1.28E-04 | -2.21752  | MIR9-3    | microRNA 9 | 407051    |
| ILMN_16667 | 1.73E-03 | 1.04E-04 | 1.2885612 | CXCL8     | C-X-C moti | 3576      |
| ILMN_23291 | 1.74E-03 | 1.05E-04 | 1.1048497 | COLQ      | collagen l | 8292      |
| ILMN_17165 | 1.82E-03 | 1.11E-04 | -1.435256 | INTU      | inturned p | 27152     |
| ILMN_17139 | 1.99E-03 | 1.24E-04 | -1.828043 | C1orf106  | chromosome | 55765     |
| ILMN_17942 | 2.34E-03 | 1.51E-04 | -2.663886 | KCNJ12    | potassium  | 3768      |
| ILMN_16718 | 1.82E-03 | 1.11E-04 | 1.0938879 | PID1      | phosphoty  | 55022     |
| ILMN_16568 | 2.18E-03 | 1.39E-04 | -2.134246 | SLC26A8   | solute car | 116369    |
| ILMN_24136 | 1.95E-03 | 1.21E-04 | 1.8381375 | LLGL2     | LLGL2, scr | 3993      |
| ILMN_17156 | 1.84E-03 | 1.13E-04 | -1.073485 | TP53I11   | tumor prot | 9537      |
| ILMN_32458 | 1.88E-03 | 1.16E-04 | 1.3478146 | SCARNA17  | small Caj  | 677769    |
| ILMN_17628 | 1.88E-03 | 1.16E-04 | 1.3837471 | KLF12     | Kruppel li | 11278     |
| ILMN_17736 | 2.12E-03 | 1.34E-04 | -4.503684 | OR7E91P   | olfactory  | 79315     |
| ILMN_16998 | 1.99E-03 | 1.24E-04 | -1.007059 | RAB27A    | RAB27A, me | 5873      |
| ILMN_32351 | 1.94E-03 | 1.20E-04 | 1.0060588 | TRABD2A   | TraB domai | 129293    |
| ILMN_16925 | 1.98E-03 | 1.23E-04 | 1.0855668 | VNN2      | vanin 2    | 8875      |
| ILMN_18088 | 2.00E-03 | 1.26E-04 | 1.3208894 | NPR2      | natriureti | 4882      |
| ILMN_23767 | 2.00E-03 | 1.25E-04 | -1.241488 | CDKN2B    | cyclin dep | 1030      |
| ILMN_23031 | 1.97E-03 | 1.23E-04 | 1.2829808 | MBNL3     | muscleblir | 55796     |
| ILMN_16557 | 2.40E-03 | 1.56E-04 | -2.829918 | ANKRD34B  | ankyrin re | 340120    |
| ILMN_17118 | 2.14E-03 | 1.36E-04 | 1.2361267 | SLC24A2   | solute car | 25769     |
| ILMN_23966 | 2.16E-03 | 1.38E-04 | -1.290755 | PDLIM7    | PDZ and LI | 9260      |
| ILMN_16790 | 2.68E-03 | 1.78E-04 | -2.264164 | OR51A7    | olfactory  | 119687    |
| ILMN_18017 | 2.22E-03 | 1.42E-04 | -1.114144 | PSG9      | pregnancy  | 5678      |

|            |          |          |           |          |            |        |
|------------|----------|----------|-----------|----------|------------|--------|
| ILMN_17859 | 2.67E-03 | 1.78E-04 | -2.279392 | C1QC     | complement | 714    |
| ILMN_22568 | 2.28E-03 | 1.47E-04 | -1.195238 | BTN2A2   | butyrophil | 10385  |
| ILMN_17769 | 2.30E-03 | 1.49E-04 | 1.2868457 | MS4A1    | membrane s | 931    |
| ILMN_23394 | 4.38E-04 | 1.96E-05 | -7.498442 | ACE      | angiotensi | 1636   |
| ILMN_17330 | 2.61E-03 | 1.72E-04 | -1.900829 | RAB36    | RAB36, men | 9609   |
| ILMN_23703 | 2.59E-03 | 1.71E-04 | -2.105323 | MS4A4A   | membrane s | 51338  |
| ILMN_17379 | 2.36E-03 | 1.52E-04 | 1.0707483 | ELOVL4   | ELOVL fatt | 6785   |
| ILMN_17059 | 2.38E-03 | 1.54E-04 | -1.015744 | HNMT     | histamine  | 3176   |
| ILMN_16927 | 2.38E-03 | 1.54E-04 | 1.0271673 | ITGB3BP  | integrin s | 23421  |
| ILMN_17969 | 2.39E-03 | 1.55E-04 | -1.090711 | TPX2     | TPX2, micr | 22974  |
| ILMN_17292 | 2.53E-03 | 1.66E-04 | 1.5127875 | NMUR1    | neuromedir | 10316  |
| ILMN_17316 | 2.44E-03 | 1.59E-04 | 1.0546894 | TMSB15B  | thymosin b | 286527 |
| ILMN_17906 | 2.43E-03 | 1.59E-04 | 1.1465484 | GNLY     | granulysin | 10578  |
| ILMN_20692 | 2.45E-03 | 1.60E-04 | 1.6307719 | PVALB    | parvalbumi | 5816   |
| ILMN_17369 | 2.49E-03 | 1.63E-04 | -1.262548 | PLB1     | phospholip | 151056 |
| ILMN_16737 | 2.81E-03 | 1.88E-04 | -1.645854 | EXO1     | exonucleas | 9156   |
| ILMN_22402 | 2.63E-03 | 1.75E-04 | 1.2476971 | SYTL2    | synaptotag | 54843  |
| ILMN_16522 | 2.69E-03 | 1.79E-04 | 1.4193246 | NOG      | noggin     | 9241   |
| ILMN_17332 | 2.73E-03 | 1.83E-04 | -1.205099 | CD163    | CD163 mole | 9332   |
| ILMN_32435 | 3.16E-03 | 2.19E-04 | -3.895671 | HIST2H3A | histone cl | 333932 |
| ILMN_18067 | 2.77E-03 | 1.85E-04 | 1.1342152 | MS4A2    | membrane s | 2206   |
| ILMN_17161 | 2.81E-03 | 1.89E-04 | 1.1728817 | FAXDC2   | fatty acid | 10826  |
| ILMN_17392 | 3.07E-03 | 2.11E-04 | -1.717884 | OMG      | oligodendr | 4974   |
| ILMN_23844 | 2.82E-03 | 1.90E-04 | 1.1350809 | RTBDN    | retbindin  | 83546  |
| ILMN_17087 | 2.88E-03 | 1.94E-04 | 1.1923875 | GNLY     | granulysin | 10578  |
| ILMN_17414 | 2.94E-03 | 2.00E-04 | -1.013264 | USP30    | ubiquitin  | 84749  |
| ILMN_16611 | 2.95E-03 | 2.00E-04 | 1.1476804 | CLCF1    | cardiotrop | 23529  |
| ILMN_16842 | 3.03E-03 | 2.07E-04 | 1.3017727 | MYL4     | myosin lig | 4635   |
| ILMN_24112 | 3.22E-03 | 2.23E-04 | 1.4709325 | NRCAM    | neuronal c | 4897   |
| ILMN_16891 | 3.10E-03 | 2.13E-04 | -1.03778  | PLPP4    | phospholip | 196051 |
| ILMN_17671 | 3.24E-03 | 2.26E-04 | -1.251831 | CMIP     | c-Maf indu | 80790  |
| ILMN_18265 | 3.57E-03 | 2.55E-04 | -1.931248 | APBB2    | amyloid be | 323    |
| ILMN_17901 | 3.25E-03 | 2.27E-04 | 1.2674023 | KIT      | KIT proto- | 3815   |
| ILMN_24081 | 3.27E-03 | 2.28E-04 | 1.1942519 | CD200R1  | CD200 rece | 131450 |
| ILMN_23530 | 3.29E-03 | 2.29E-04 | 1.1520014 | GRAP     | GRB2-relat | 10750  |
| ILMN_32684 | 3.47E-03 | 2.45E-04 | -1.174046 | CCL14    | C-C motif  | 6358   |
| ILMN_21402 | 3.43E-03 | 2.41E-04 | 1.1077615 | DPH6     | diphthamir | 89978  |
| ILMN_23719 | 3.97E-03 | 2.92E-04 | -2.133549 | MUC1     | mucin 1, c | 4582   |
| ILMN_22029 | 3.67E-03 | 2.64E-04 | -1.570304 | BUB1     | BUB1 mitot | 699    |
| ILMN_32434 | 3.47E-03 | 2.46E-04 | -1.400796 | LIPN     | lipase fan | 643418 |
| ILMN_17079 | 3.49E-03 | 2.47E-04 | -1.651971 | CARD17   | caspase re | 440068 |
| ILMN_17567 | 3.51E-03 | 2.49E-04 | 1.5826379 | RUNDC3A  | RUN domair | 10900  |
| ILMN_23768 | 3.56E-03 | 2.53E-04 | 1.3537776 | PDGFD    | platelet c | 80310  |
| ILMN_23409 | 3.87E-03 | 2.82E-04 | -2.152197 | GRB10    | growth fac | 2887   |
| ILMN_16828 | 3.59E-03 | 2.57E-04 | -1.036116 | PRKCD    | protein ki | 5580   |
| ILMN_23494 | 3.67E-03 | 2.64E-04 | -1.408163 | BIRC5    | baculovira | 332    |
| ILMN_17554 | 4.37E-03 | 3.28E-04 | -1.699891 | RBMS2    | RNA bindir | 5939   |

|            |          |          |           |           |            |           |
|------------|----------|----------|-----------|-----------|------------|-----------|
| ILMN_17939 | 3.71E-03 | 2.67E-04 | 1.3592814 | MXI1      | MAX intera | 4601      |
| ILMN_22015 | 3.71E-03 | 2.68E-04 | 1.0147357 | GSTM2     | glutathior | 2946      |
| ILMN_17000 | 3.89E-03 | 2.84E-04 | 1.0570864 | UST       | uronyl 2-s | 10090     |
| ILMN_17965 | 3.97E-03 | 2.91E-04 | -1.213897 | TRIP13    | thyroid hc | 9319      |
| ILMN_17548 | 3.87E-03 | 2.82E-04 | 1.1507556 | PASK      | PAS domair | 23178     |
| ILMN_32938 | 4.20E-03 | 3.13E-04 | -1.039965 | FAM27C    | family wit | 100132948 |
| ILMN_17057 | 4.01E-03 | 2.96E-04 | -1.004658 | ARHGEF40  | Rho guanir | 55701     |
| ILMN_17310 | 4.60E-03 | 3.50E-04 | -1.544498 | ORC6      | origin rec | 23594     |
| ILMN_16635 | 4.38E-03 | 3.29E-04 | -2.701332 | OTOF      | otoferlin  | 9381      |
| ILMN_17448 | 5.49E-03 | 4.37E-04 | -3.371839 | KCNN3     | potassium  | 3782      |
| ILMN_16760 | 4.30E-03 | 3.23E-04 | 1.2973827 | SPON2     | spondin 2  | 10417     |
| ILMN_16764 | 4.18E-03 | 3.11E-04 | 1.0287564 | TCF7      | transcript | 6932      |
| ILMN_16705 | 4.24E-03 | 3.17E-04 | -1.125488 | WDFY3     | WD repeat  | 23001     |
| ILMN_17470 | 4.25E-03 | 3.18E-04 | -1.135261 | CEP55     | centrosome | 55165     |
| ILMN_16792 | 4.38E-03 | 3.30E-04 | -1.307227 | FAM110B   | family wit | 90362     |
| ILMN_16937 | 4.59E-03 | 3.49E-04 | -1.441208 | ASPH      | aspartate  | 444       |
| ILMN_16804 | 4.25E-03 | 3.17E-04 | -1.939086 | CTSG      | cathepsin  | 1511      |
| ILMN_33091 | 5.84E-03 | 4.73E-04 | -2.093088 | SNAR-I    | small ILF3 | 100170222 |
| ILMN_17603 | 4.38E-03 | 3.30E-04 | 1.6754751 | VWCE      | von Willek | 220001    |
| ILMN_17666 | 4.96E-03 | 3.84E-04 | -1.823696 | PKMYT1    | protein ki | 9088      |
| ILMN_21945 | 4.55E-03 | 3.45E-04 | 1.4786756 | PLVAP     | plasmalemm | 83483     |
| ILMN_17746 | 4.47E-03 | 3.38E-04 | 1.2489697 | IL24      | interleuki | 11009     |
| ILMN_23830 | 4.46E-03 | 3.37E-04 | 1.0901735 | SIRPG     | signal reg | 55423     |
| ILMN_17370 | 4.55E-03 | 3.45E-04 | 1.0650923 | GGT7      | gamma-glut | 2686      |
| ILMN_17390 | 4.83E-03 | 3.71E-04 | -1.228163 | HIST1H2B0 | histone cl | 8348      |
| ILMN_16769 | 4.57E-03 | 3.47E-04 | 1.1318657 | CABP5     | calcium bi | 56344     |
| ILMN_20688 | 5.36E-03 | 4.24E-04 | -1.608332 | AATK      | apoptosis  | 9625      |
| ILMN_18515 | 5.27E-03 | 4.14E-04 | -1.371036 | FGF12     | fibroblast | 2257      |
| ILMN_17257 | 4.76E-03 | 3.65E-04 | 1.1021235 | CARNS1    | carnosine  | 57571     |
| ILMN_16987 | 5.10E-03 | 3.97E-04 | -1.394667 | FGD4      | FYVE, RhoC | 121512    |
| ILMN_17289 | 5.24E-03 | 4.11E-04 | -1.31759  | FAM64A    | family wit | 54478     |
| ILMN_16654 | 4.99E-03 | 3.88E-04 | 1.2812731 | CLEC4C    | C-type lec | 170482    |
| ILMN_17792 | 4.99E-03 | 3.88E-04 | -5.946034 | C7orf33   | chromosome | 202865    |
| ILMN_32352 | 5.00E-03 | 3.88E-04 | -1.38118  | LOC644936 | actin, bet | 644936    |
| ILMN_16849 | 5.68E-03 | 4.55E-04 | -1.834435 | ARSD      | arylsulfat | 414       |
| ILMN_32382 | 2.16E-03 | 1.38E-04 | -6.969123 | LRRC70    | leucine ri | 100130733 |
| ILMN_21605 | 5.26E-03 | 4.12E-04 | 1.0080847 | TMIGD2    | transmembr | 126259    |
| ILMN_17244 | 5.38E-03 | 4.26E-04 | -1.001043 | CARD16    | caspase re | 114769    |
| ILMN_23355 | 6.43E-03 | 5.32E-04 | -1.96646  | ITIH5     | inter-alph | 80760     |
| ILMN_23251 | 5.27E-03 | 4.13E-04 | 1.1385409 | TYSND1    | trypsin dc | 219743    |
| ILMN_16726 | 6.07E-03 | 4.96E-04 | -1.846048 | OAS1      | 2'-5'-olig | 4938      |
| ILMN_16793 | 7.00E-03 | 5.91E-04 | -2.519726 | ARSJ      | arylsulfat | 79642     |
| ILMN_20593 | 5.70E-03 | 4.58E-04 | 1.6144002 | KLRC2     | killer cel | 3822      |
| ILMN_16702 | 5.72E-03 | 4.59E-04 | -1.301157 | CDC45     | cell divis | 8318      |
| ILMN_33054 | 5.87E-03 | 4.76E-04 | -1.289042 | ZNF788    | zinc finge | 388507    |
| ILMN_33101 | 7.59E-03 | 6.52E-04 | -2.17482  | MIR210    | microRNA 2 | 406992    |
| ILMN_16767 | 5.66E-03 | 4.52E-04 | 1.1829148 | SIRPG     | signal reg | 55423     |



|            |          |          |           |            |            |           |
|------------|----------|----------|-----------|------------|------------|-----------|
| ILMN_23962 | 5.66E-03 | 4.53E-04 | -1.258717 | RFX2       | regulatory | 5990      |
| ILMN_16910 | 5.71E-03 | 4.59E-04 | -1.063194 | SLC22A18A5 | solute car | 5003      |
| ILMN_18047 | 5.90E-03 | 4.79E-04 | -1.346621 | CBS        | cystathior | 875       |
| ILMN_22964 | 2.28E-03 | 1.47E-04 | -7.488829 | GH2        | growth hor | 2689      |
| ILMN_20938 | 5.79E-03 | 4.67E-04 | 1.1051103 | ZNF571     | zinc finge | 51276     |
| ILMN_22250 | 6.30E-03 | 5.19E-04 | -4.707634 | TRIM71     | tripartite | 131405    |
| ILMN_32436 | 6.38E-03 | 5.27E-04 | -1.555863 | NRADDP     | neurotrop  | 100129354 |
| ILMN_17863 | 5.82E-03 | 4.69E-04 | -1.504402 | LILRA3     | leukocyte  | 11026     |
| ILMN_17934 | 8.24E-03 | 7.25E-04 | -2.560434 | OR2G3      | olfactory  | 81469     |
| ILMN_17661 | 5.86E-03 | 4.75E-04 | -1.040081 | MRV11      | murine ret | 10335     |
| ILMN_17309 | 7.66E-03 | 6.61E-04 | -2.697046 | TTC24      | tetratricc | 164118    |
| ILMN_17244 | 5.95E-03 | 4.84E-04 | 1.2904081 | GCAT       | glycine C- | 23464     |
| ILMN_17087 | 6.07E-03 | 4.96E-04 | -1.23951  | NT5DC2     | 5'-nucleot | 64943     |
| ILMN_16636 | 6.30E-03 | 5.19E-04 | 1.3619775 | MTUS1      | microtubul | 57509     |
| ILMN_16686 | 7.45E-03 | 6.38E-04 | -1.758137 | AKR1C2     | aldo-keto  | 1646      |
| ILMN_16686 | 8.35E-03 | 7.37E-04 | -3.283744 | RBPMS      | RNA bindir | 11030     |
| ILMN_33083 | 6.92E-03 | 5.83E-04 | -5.190531 | MIR590     | microRNA 5 | 693175    |
| ILMN_17510 | 6.28E-03 | 5.17E-04 | 1.2973414 | PACSIN1    | protein ki | 29993     |
| ILMN_18019 | 6.33E-03 | 5.23E-04 | -1.219274 | CCNB2      | cyclin B2  | 9133      |
| ILMN_18031 | 8.18E-03 | 7.17E-04 | -3.498639 | BIRC5      | baculovira | 332       |
| ILMN_33050 | 8.47E-03 | 7.52E-04 | -1.983393 | LOC730159  | uncharacte | 730159    |
| ILMN_17234 | 6.63E-03 | 5.51E-04 | -1.769054 | PFKFB2     | 6-phosphof | 5208      |
| ILMN_33107 | 8.90E-03 | 8.00E-04 | -2.126286 | MIR512-2   | microRNA 5 | 574459    |
| ILMN_16908 | 7.56E-03 | 6.50E-04 | -1.320041 | AGER       | advanced g | 177       |
| ILMN_16996 | 6.72E-03 | 5.61E-04 | 1.0746048 | CXCR5      | C-X-C moti | 643       |
| ILMN_21883 | 9.48E-03 | 8.66E-04 | -2.792648 | OR10H5     | olfactory  | 284433    |
| ILMN_23625 | 8.21E-03 | 7.21E-04 | -1.491183 | ZWINT      | ZW10 inter | 11130     |
| ILMN_18143 | 6.78E-03 | 5.69E-04 | 1.4863343 | EPB42      | erythrocyt | 2038      |
| ILMN_32459 | 8.90E-03 | 8.00E-04 | -1.752584 | LINC00895  | long inter | 150185    |
| ILMN_33063 | 8.20E-03 | 7.20E-04 | -1.456291 | C1QTNF9B-1 | C1QTNF9B 2 | 542767    |
| ILMN_20923 | 7.12E-03 | 6.03E-04 | 1.249376  | BEND2      | BEN domair | 139105    |
| ILMN_16544 | 8.42E-03 | 7.45E-04 | -1.295485 | CCL18      | C-C motif  | 6362      |
| ILMN_18119 | 7.09E-03 | 6.00E-04 | 1.1856828 | OR2W3      | olfactory  | 343171    |
| ILMN_16545 | 7.30E-03 | 6.20E-04 | 1.0703766 | EFNB1      | ephrin B1  | 1947      |
| ILMN_16944 | 7.34E-03 | 6.26E-04 | 1.518862  | HMBS       | hydroxymet | 3145      |
| ILMN_24092 | 8.30E-03 | 7.32E-04 | -1.505497 | HMMR       | hyaluronar | 3161      |
| ILMN_21736 | 7.89E-03 | 6.86E-04 | -1.083893 | TBC1D3F    | TBC1 domai | 84218     |
| ILMN_18166 | 7.40E-03 | 6.32E-04 | -1.085075 | SLC8A1     | solute car | 6546      |
| ILMN_17131 | 7.43E-03 | 6.36E-04 | 1.0500597 | GSTM2      | glutathior | 2946      |
| ILMN_32376 | 7.46E-03 | 6.40E-04 | 1.0955103 | CLUHP3     | clustered  | 100132341 |
| ILMN_17468 | 9.80E-03 | 9.01E-04 | -3.822861 | PCOLCE2    | procollage | 26577     |
| ILMN_16563 | 8.01E-03 | 6.99E-04 | 1.3228371 | BNC2       | basonuclir | 54796     |
| ILMN_17562 | 8.07E-03 | 7.06E-04 | -1.313103 | MOV10L1    | Mov10 RISC | 54456     |
| ILMN_17286 | 7.63E-03 | 6.57E-04 | -1.276112 | FCGR3B     | Fc fragmer | 2215      |
| ILMN_17424 | 7.64E-03 | 6.58E-04 | 1.0196732 | BCL2L1     | BCL2 like  | 598       |
| ILMN_17889 | 8.66E-03 | 7.73E-04 | -1.454481 | KREMEN1    | kringle cc | 83999     |
| ILMN_16563 | 8.28E-03 | 7.29E-04 | -1.412138 | FBX048     | F-box prot | 554251    |

|            |          |          |           |              |             |           |
|------------|----------|----------|-----------|--------------|-------------|-----------|
| ILMN_17351 | 7.72E-03 | 6.68E-04 | 1.0311207 | GALNT12      | polypeptic  | 79695     |
| ILMN_18088 | 7.83E-03 | 6.81E-04 | -1.090418 | TBKBP1       | TBK1 bindi  | 9755      |
| ILMN_19036 | 8.15E-03 | 7.15E-04 | -1.072617 | LOC105376545 | uncharacte  | 105376544 |
| ILMN_32355 | 8.12E-03 | 7.11E-04 | 1.2884525 | GPR183       | G protein-  | 1880      |
| ILMN_23490 | 1.03E-02 | 9.62E-04 | -2.190449 | ADGRG2       | adhesion C  | 10149     |
| ILMN_17895 | 8.03E-03 | 7.02E-04 | 1.1135006 | NBL1         | neuroblast  | 4681      |
| ILMN_21500 | 8.36E-03 | 7.39E-04 | -1.356793 | CES1P1       | carboxyles  | 51716     |
| ILMN_17255 | 8.36E-03 | 7.38E-04 | -1.335166 | DHCR24       | 24-dehydro  | 1718      |
| ILMN_17335 | 8.00E-03 | 6.98E-04 | 1.1072346 | TEX9         | testis exp  | 374618    |
| ILMN_31885 | 8.80E-03 | 7.89E-04 | -1.372441 | HPN-AS1      | HPN antisec | 100128675 |
| ILMN_16590 | 8.07E-03 | 7.06E-04 | 1.1520202 | CD40LG       | CD40 ligar  | 959       |
| ILMN_16515 | 8.66E-03 | 7.72E-04 | 1.4243594 | SPP1         | secreted p  | 6696      |
| ILMN_22295 | 8.45E-03 | 7.48E-04 | 1.1391235 | KIT          | KIT proto-  | 3815      |
| ILMN_16819 | 1.09E-02 | 1.03E-03 | -1.946467 | TMEM232      | transmembr  | 642987    |
| ILMN_16944 | 8.35E-03 | 7.37E-04 | 1.3974731 | CRIP2        | cysteine r  | 1397      |
| ILMN_17986 | 8.38E-03 | 7.41E-04 | 1.0607522 | ANO9         | anoctamin   | 338440    |
| ILMN_18125 | 8.68E-03 | 7.75E-04 | 1.3133543 | RNF14        | ring finge  | 9604      |
| ILMN_23985 | 9.18E-03 | 8.32E-04 | -1.192898 | PML          | promyelocy  | 5371      |
| ILMN_16786 | 8.92E-03 | 8.03E-04 | -1.236442 | RRM2         | ribonucleo  | 6241      |
| ILMN_24150 | 1.18E-02 | 1.13E-03 | -1.833947 | ATP2B3       | ATPase pla  | 492       |
| ILMN_17026 | 1.13E-02 | 1.08E-03 | -2.38527  | B3GNT5       | UDP-GlcNac  | 84002     |
| ILMN_17307 | 8.66E-03 | 7.71E-04 | 1.0773252 | ADORA3       | adenosine   | 140       |
| ILMN_32705 | 9.01E-03 | 8.13E-04 | 1.3405881 | KLF3-AS1     | KLF3 antis  | 79667     |
| ILMN_16535 | 1.15E-02 | 1.10E-03 | -1.729847 | IL22RA2      | interleuki  | 116379    |
| ILMN_17090 | 9.20E-03 | 8.34E-04 | 1.4985274 | ABCC13       | ATP bindir  | 150000    |
| ILMN_17734 | 8.86E-03 | 7.96E-04 | 1.2191281 | DOCK9        | dedicator   | 23348     |
| ILMN_22129 | 8.99E-03 | 8.11E-04 | -1.326101 | MELK         | maternal e  | 9833      |
| ILMN_17684 | 8.85E-03 | 7.95E-04 | -1.176332 | TCN1         | transcobal  | 6947      |
| ILMN_17949 | 1.21E-02 | 1.17E-03 | -2.614888 | ABCA4        | ATP bindir  | 24        |
| ILMN_16762 | 9.91E-03 | 9.14E-04 | -1.242873 | ABCC2        | ATP bindir  | 1244      |
| ILMN_17597 | 9.00E-03 | 8.11E-04 | -1.139098 | THBD         | thrombomoc  | 7056      |
| ILMN_17242 | 1.24E-02 | 1.21E-03 | -2.376286 | INSL6        | insulin li  | 11172     |
| ILMN_17220 | 9.02E-03 | 8.15E-04 | -1.168256 | ARSB         | arylsulfat  | 411       |
| ILMN_22256 | 9.54E-03 | 8.72E-04 | 1.1501318 | FAM135A      | family wit  | 57579     |
| ILMN_16945 | 1.05E-02 | 9.85E-04 | -1.734056 | CLTCL1       | clathrin h  | 8218      |
| ILMN_16586 | 1.08E-02 | 1.01E-03 | -1.381697 | NUF2         | NUF2, NDC8  | 83540     |
| ILMN_17869 | 1.43E-02 | 1.45E-03 | -2.775    | OR52B2       | olfactory   | 255725    |
| ILMN_16580 | 1.29E-02 | 1.26E-03 | 2.1931341 | ZNF365       | zinc finge  | 22891     |
| ILMN_17368 | 1.00E-02 | 9.24E-04 | 1.6878736 | PRSS33       | protease,   | 260429    |
| ILMN_17162 | 1.43E-02 | 1.44E-03 | -2.290951 | PSG6         | pregnancy   | 5675      |
| ILMN_17919 | 1.01E-02 | 9.37E-04 | -1.112901 | RASGRP4      | RAS guanyl  | 115727    |
| ILMN_16922 | 9.80E-03 | 9.00E-04 | -1.130038 | LCN2         | lipocalin   | 3934      |
| ILMN_17079 | 9.83E-03 | 9.05E-04 | -1.143755 | ABHD12B      | abhydrolas  | 145447    |
| ILMN_23529 | 1.23E-02 | 1.19E-03 | -1.814652 | ASPH         | aspartate   | 444       |
| ILMN_16886 | 1.02E-02 | 9.46E-04 | -1.011529 | FBXL2        | F-box and   | 25827     |
| ILMN_17580 | 1.00E-02 | 9.27E-04 | 1.0128969 | NFIA         | nuclear fa  | 4774      |
| ILMN_16678 | 1.45E-02 | 1.47E-03 | 2.1003451 | XAGE5        | X antigen   | 170627    |

|            |          |          |           |           |            |        |
|------------|----------|----------|-----------|-----------|------------|--------|
| ILMN_16765 | 1.06E-02 | 9.97E-04 | 1.1891867 | KDF1      | keratinocy | 126695 |
| ILMN_23065 | 1.01E-02 | 9.33E-04 | 1.0255663 | PDE9A     | phosphodie | 5152   |
| ILMN_18074 | 1.03E-02 | 9.64E-04 | 1.1254523 | IKZF2     | IKAROS fan | 22807  |
| ILMN_17698 | 1.17E-02 | 1.12E-03 | -1.41693  | HORMAD1   | HORMA doma | 84072  |
| ILMN_16634 | 1.07E-02 | 1.00E-03 | 1.0773862 | LIN7B     | lin-7 homc | 64130  |
| ILMN_17742 | 1.18E-02 | 1.14E-03 | -1.280165 | C2orf82   | chromosome | 389084 |
| ILMN_16792 | 1.38E-02 | 1.39E-03 | -2.268303 | AP3B2     | adaptor re | 8120   |
| ILMN_16606 | 1.16E-02 | 1.11E-03 | -1.58687  | CDCA2     | cell divis | 157313 |
| ILMN_16616 | 1.08E-02 | 1.02E-03 | -1.08931  | LILRA3    | leukocyte  | 11026  |
| ILMN_18027 | 1.09E-02 | 1.03E-03 | -1.003768 | FFAR3     | free fatty | 2865   |
| ILMN_17929 | 1.20E-02 | 1.16E-03 | -1.292706 | SOD2      | superoxide | 6648   |
| ILMN_18149 | 1.15E-02 | 1.10E-03 | 1.033386  | TLE2      | transducir | 7089   |
| ILMN_18125 | 1.27E-02 | 1.25E-03 | -1.262194 | ICA1      | islet cell | 3382   |
| ILMN_32867 | 1.19E-02 | 1.14E-03 | -1.052204 | LOC284648 | uncharacte | 284648 |
| ILMN_16689 | 1.20E-02 | 1.16E-03 | 1.0341769 | BEGAIN    | brain enri | 57596  |
| ILMN_18554 | 1.22E-02 | 1.18E-03 | 1.0582331 | ADM5      | adrenomed  | 199800 |
| ILMN_23812 | 1.18E-02 | 1.13E-03 | -1.312539 | DSC2      | desmocolli | 1824   |
| ILMN_17615 | 1.53E-02 | 1.57E-03 | -1.72142  | C7orf57   | chromosome | 136288 |
| ILMN_17307 | 1.29E-02 | 1.27E-03 | -1.352821 | VSIG8     | V-set and  | 391123 |
| ILMN_21414 | 1.21E-02 | 1.17E-03 | 1.2363263 | SERPINF1  | serpin fan | 5176   |
| ILMN_32451 | 1.21E-02 | 1.16E-03 | -1.145311 | CFAP45    | cilia and  | 25790  |
| ILMN_20587 | 1.21E-02 | 1.16E-03 | -2.324563 | IFI27     | interferor | 3429   |
| ILMN_21094 | 1.22E-02 | 1.18E-03 | 1.0928944 | GZMB      | granzyme F | 3002   |
| ILMN_18153 | 8.06E-03 | 7.05E-04 | -6.477313 | NR5A1     | nuclear re | 2516   |
| ILMN_18131 | 1.31E-02 | 1.29E-03 | 1.245589  | RORA      | RAR relate | 6095   |
| ILMN_21295 | 1.68E-02 | 1.76E-03 | -2.024653 | LDLRAD3   | low densit | 143458 |
| ILMN_16961 | 1.79E-02 | 1.91E-03 | -2.103812 | ANKS1B    | ankyrin re | 56899  |
| ILMN_16516 | 1.49E-02 | 1.52E-03 | -1.329224 | RTN3      | reticulon  | 10313  |
| ILMN_17013 | 1.32E-02 | 1.30E-03 | 1.0759091 | STRADB    | STE20-rela | 55437  |
| ILMN_32385 | 1.49E-02 | 1.52E-03 | -1.95328  | CARD17    | caspase re | 440068 |
| ILMN_17604 | 1.40E-02 | 1.40E-03 | 1.217061  | SHISA2    | shisa fami | 387914 |
| ILMN_23753 | 2.05E-02 | 2.26E-03 | -2.839182 | COL4A5    | collagen t | 1287   |
| ILMN_17792 | 1.45E-02 | 1.46E-03 | 1.2217361 | CDH2      | cadherin 2 | 1000   |
| ILMN_21026 | 1.38E-02 | 1.39E-03 | 1.3110269 | GATA2     | GATA bindi | 2624   |
| ILMN_18657 | 1.41E-02 | 1.42E-03 | 1.1413249 | LOC729451 | uncharacte | 729451 |
| ILMN_22333 | 2.20E-02 | 2.46E-03 | -2.356461 | MYH16     | myosin hea | 84176  |
| ILMN_23885 | 1.42E-02 | 1.44E-03 | -1.080277 | EPSTI1    | epithelial | 94240  |
| ILMN_17972 | 1.55E-02 | 1.60E-03 | 1.202842  | TGM2      | transgluta | 7052   |
| ILMN_16940 | 1.45E-02 | 1.47E-03 | 1.0954534 | SESN3     | sestrin 3  | 143686 |
| ILMN_17466 | 1.57E-02 | 1.62E-03 | -1.125343 | DYNAP     | dynactin a | 284254 |
| ILMN_17764 | 1.53E-02 | 1.56E-03 | -1.033173 | C17orf53  | chromosome | 78995  |
| ILMN_23298 | 1.70E-02 | 1.79E-03 | -1.412521 | CEP170    | centrosome | 9859   |
| ILMN_20864 | 2.02E-02 | 2.21E-03 | -2.958419 | PDGFRA    | platelet c | 5156   |
| ILMN_16578 | 1.53E-02 | 1.57E-03 | 1.0253353 | SIRT4     | sirtuin 4  | 23409  |
| ILMN_17356 | 2.07E-02 | 2.28E-03 | -4.629036 | FBXW11    | F-box and  | 23291  |
| ILMN_16597 | 1.69E-02 | 1.78E-03 | -1.218563 | KCNJ15    | potassium  | 3772   |
| ILMN_16671 | 1.62E-02 | 1.68E-03 | 1.3386814 | NKX3-1    | NK3 homeok | 4824   |

|            |          |          |           |           |            |           |
|------------|----------|----------|-----------|-----------|------------|-----------|
| ILMN_17895 | 1.74E-02 | 1.84E-03 | -1.527537 | PKD2L1    | polycystin | 9033      |
| ILMN_21728 | 2.05E-02 | 2.25E-03 | -1.33429  | SLC18A1   | solute car | 6570      |
| ILMN_17910 | 1.59E-02 | 1.66E-03 | 1.1094669 | AHI1      | Abelson he | 54806     |
| ILMN_18136 | 1.71E-02 | 1.81E-03 | -1.306569 | NEK11     | NIMA relat | 79858     |
| ILMN_17332 | 1.59E-02 | 1.65E-03 | 1.0535383 | KIR3DL1   | killer cel | 3811      |
| ILMN_22818 | 2.01E-02 | 2.20E-03 | -1.727519 | PSG4      | pregnancy  | 5672      |
| ILMN_17819 | 1.62E-02 | 1.69E-03 | -1.060236 | HMMR      | hyaluronar | 3161      |
| ILMN_21447 | 1.70E-02 | 1.79E-03 | 1.1764577 | GOLGA6B   | golgin A6  | 55889     |
| ILMN_17855 | 1.72E-02 | 1.82E-03 | -1.011346 | ERMAP     | erythrobla | 114625    |
| ILMN_20682 | 1.75E-02 | 1.86E-03 | 1.0957914 | CLEC9A    | C-type lec | 283420    |
| ILMN_17230 | 1.73E-02 | 1.83E-03 | -1.73206  | OLR1      | oxidized l | 4973      |
| ILMN_17607 | 2.67E-02 | 3.16E-03 | -2.202799 | KIRREL2   | kin of IRF | 84063     |
| ILMN_32379 | 1.71E-02 | 1.80E-03 | 1.0593817 | BEND2     | BEN domair | 139105    |
| ILMN_18156 | 2.22E-02 | 2.49E-03 | 1.5054232 | DKK3      | dickkopf V | 27122     |
| ILMN_17952 | 1.89E-02 | 2.05E-03 | -1.426029 | GPER1     | G protein- | 2852      |
| ILMN_32511 | 1.77E-02 | 1.89E-03 | -1.030876 | LDHA      | lactate de | 3939      |
| ILMN_21659 | 1.80E-02 | 1.93E-03 | 1.6294962 | ITLN1     | intelectir | 55600     |
| ILMN_17280 | 1.97E-02 | 2.15E-03 | -1.303977 | S100A16   | S100 calci | 140576    |
| ILMN_18901 | 1.79E-02 | 1.91E-03 | 1.1959309 | TRAV20    | T cell rec | 28663     |
| ILMN_32005 | 2.43E-02 | 2.81E-03 | -2.040047 | ARMCX4    | armadillo  | 100131755 |
| ILMN_20425 | 1.87E-02 | 2.02E-03 | -1.17096  | MRPL42P5  | mitochondr | 359821    |
| ILMN_18099 | 1.53E-02 | 1.56E-03 | -5.719719 | CADPS     | calcium de | 8618      |
| ILMN_18105 | 2.03E-02 | 2.23E-03 | -1.506823 | IL1R1     | interleuki | 3554      |
| ILMN_17689 | 2.62E-02 | 3.08E-03 | -2.275875 | TSN       | translin   | 7247      |
| ILMN_17667 | 2.26E-02 | 2.56E-03 | -1.203973 | RBMS1     | RNA bindir | 5937      |
| ILMN_32458 | 2.72E-02 | 3.23E-03 | -2.668831 | PWAR1     | Prader Wil | 145624    |
| ILMN_21842 | 2.26E-02 | 2.56E-03 | -1.990266 | OAS3      | 2'-5'-olig | 4940      |
| ILMN_18065 | 1.91E-02 | 2.08E-03 | 1.051826  | PDE7B     | phosphodie | 27115     |
| ILMN_32513 | 2.34E-02 | 2.69E-03 | -1.715908 | NBPF7     | neuroblast | 343505    |
| ILMN_17090 | 2.79E-02 | 3.34E-03 | -2.431873 | C6orf10   | chromosome | 10665     |
| ILMN_17962 | 1.69E-02 | 1.77E-03 | -5.366726 | SLC13A3   | solute car | 64849     |
| ILMN_21637 | 2.93E-02 | 3.54E-03 | -2.724931 | CGB5      | chorionic  | 93659     |
| ILMN_22599 | 2.26E-02 | 2.55E-03 | -1.409971 | BCKDHB    | branched c | 594       |
| ILMN_17732 | 2.98E-02 | 3.63E-03 | -2.150429 | XCR1      | X-C motif  | 2829      |
| ILMN_18027 | 2.81E-02 | 3.37E-03 | -3.698489 | TAS2R50   | taste 2 re | 259296    |
| ILMN_33095 | 2.89E-02 | 3.49E-03 | -2.276299 | MIR30E    | microRNA 3 | 407034    |
| ILMN_16739 | 1.95E-02 | 2.12E-03 | 1.026707  | MAT2B     | methionine | 27430     |
| ILMN_16538 | 2.30E-02 | 2.61E-03 | -1.328874 | LAMC2     | laminin su | 3918      |
| ILMN_17248 | 2.41E-02 | 2.78E-03 | -1.765426 | OR10T2    | olfactory  | 128360    |
| ILMN_17945 | 2.22E-02 | 2.49E-03 | -1.377372 | ZKSCAN7   | zinc finge | 55888     |
| ILMN_17448 | 2.51E-02 | 2.93E-03 | -1.639064 | ARHGAP11A | Rho GTPase | 9824      |
| ILMN_32439 | 2.10E-02 | 2.32E-03 | 1.105545  | SNORA17B  | small nucl | 677824    |
| ILMN_33091 | 2.72E-02 | 3.23E-03 | -1.567269 | MIR543    | microRNA 5 | 100126335 |
| ILMN_22870 | 2.33E-02 | 2.66E-03 | -1.354023 | HIF3A     | hypoxia ir | 64344     |
| ILMN_17573 | 2.15E-02 | 2.39E-03 | -1.236045 | UCHL1     | ubiquitin  | 7345      |
| ILMN_17420 | 3.14E-02 | 3.88E-03 | -2.659593 | ADCY1     | adenylate  | 107       |
| ILMN_16870 | 2.11E-02 | 2.34E-03 | -1.212728 | GAS7      | growth arr | 8522      |

|            |          |          |           |            |             |           |
|------------|----------|----------|-----------|------------|-------------|-----------|
| ILMN_23110 | 2.06E-02 | 2.27E-03 | -1.03824  | BRCA1      | BRCA1, DNA  | 672       |
| ILMN_21450 | 2.55E-02 | 2.99E-03 | -2.281171 | CCR5       | C-C motif   | 1234      |
| ILMN_21350 | 2.85E-02 | 3.43E-03 | -1.70961  | CHDH       | choline de  | 55349     |
| ILMN_22937 | 3.01E-02 | 3.68E-03 | -2.257059 | MARVELD2   | MARVEL dom  | 153562    |
| ILMN_17250 | 2.23E-02 | 2.50E-03 | -1.326968 | DPY19L3    | dpy-19 lik  | 147991    |
| ILMN_17050 | 2.79E-02 | 3.32E-03 | -2.361743 | SPAG1      | sperm assoc | 6674      |
| ILMN_17880 | 2.14E-02 | 2.38E-03 | 1.172028  | TOX        | thymocyte   | 9760      |
| ILMN_16820 | 2.16E-02 | 2.41E-03 | 1.0890425 | CLEC4C     | C-type lec  | 170482    |
| ILMN_16690 | 3.15E-02 | 3.90E-03 | -3.104678 | PCDHA10    | protocadhe  | 56139     |
| ILMN_17610 | 2.46E-02 | 2.86E-03 | -1.34597  | CACNA1A    | calcium vc  | 773       |
| ILMN_17310 | 3.31E-02 | 4.14E-03 | -3.673221 | NXF2B      | nuclear RN  | 728343    |
| ILMN_32691 | 3.47E-02 | 4.40E-03 | -3.008794 | LOC1001292 | beta-defer  | 100129216 |
| ILMN_17907 | 2.57E-02 | 3.01E-03 | -1.322573 | C8orf31    | chromosome  | 286122    |
| ILMN_22110 | 2.41E-02 | 2.78E-03 | -1.292038 | TTY6       | testis-spe  | 84672     |
| ILMN_21840 | 2.24E-02 | 2.52E-03 | 1.3212643 | CXCL8      | C-X-C moti  | 3576      |
| ILMN_16880 | 2.52E-02 | 2.94E-03 | 1.0388734 | CELA2B     | chymotryps  | 51032     |
| ILMN_17540 | 3.55E-02 | 4.53E-03 | -3.759811 | RGS9       | regulator   | 8787      |
| ILMN_20660 | 2.26E-02 | 2.56E-03 | 1.861417  | HLA-DRB6   | major hist  | 3128      |
| ILMN_17487 | 2.93E-02 | 3.54E-03 | -1.548192 | SEC16B     | SEC16 homc  | 89866     |
| ILMN_16760 | 3.16E-02 | 3.91E-03 | -2.277167 | HTRA1      | HtrA serin  | 5654      |
| ILMN_16700 | 2.33E-02 | 2.66E-03 | 1.0594461 | LPAR4      | lysophosph  | 2846      |
| ILMN_17491 | 3.44E-02 | 4.35E-03 | -4.225615 | RXFP1      | relaxin/ir  | 59350     |
| ILMN_32420 | 3.52E-02 | 4.49E-03 | -2.871695 | GTF2H2C_2  | GTF2H2 fan  | 730394    |
| ILMN_17711 | 2.33E-02 | 2.67E-03 | -1.018656 | TMEM45B    | transmembr  | 120224    |
| ILMN_17027 | 3.54E-02 | 4.51E-03 | -2.757389 | PGM5P2     | phosphoglu  | 595135    |
| ILMN_18010 | 2.38E-02 | 2.73E-03 | -1.203948 | CENPA      | centromere  | 1058      |
| ILMN_21570 | 3.17E-02 | 3.93E-03 | -1.550859 | MNS1       | meiosis sp  | 55329     |
| ILMN_16720 | 3.12E-02 | 3.85E-03 | -1.721831 | TRIM55     | tripartite  | 84675     |
| ILMN_21501 | 4.09E-02 | 5.42E-03 | -2.371783 | ZRANB3     | zinc finge  | 84083     |
| ILMN_17930 | 2.55E-02 | 2.98E-03 | -1.210122 | RPTOR      | regulatory  | 57521     |
| ILMN_17120 | 2.82E-02 | 3.38E-03 | -1.61317  | FAM89A     | family wit  | 375061    |
| ILMN_16910 | 3.39E-02 | 4.27E-03 | -1.785946 | OR4C16     | olfactory   | 219428    |
| ILMN_33080 | 3.14E-02 | 3.87E-03 | -1.710161 | MIR517B    | microRNA 5  | 574483    |
| ILMN_16860 | 2.43E-02 | 2.81E-03 | -1.055802 | TOP2A      | topoisomer  | 7153      |
| ILMN_17700 | 2.44E-02 | 2.82E-03 | 1.1017809 | TMPRSS9    | transmembr  | 360200    |
| ILMN_18000 | 3.98E-02 | 5.24E-03 | -3.832327 | WNT5A      | Wnt family  | 7474      |
| ILMN_16630 | 2.46E-02 | 2.85E-03 | -1.02379  | CDC20      | cell divis  | 991       |
| ILMN_17980 | 2.74E-02 | 3.26E-03 | 1.2699284 | KRTAP11-1  | keratin as  | 337880    |
| ILMN_17580 | 3.80E-02 | 4.96E-03 | -2.415154 | ANGPT4     | angiopoiet  | 51378     |
| ILMN_17240 | 2.52E-02 | 2.94E-03 | 1.0545601 | LYPD2      | LY6/PLAUR   | 137797    |
| ILMN_22940 | 2.89E-02 | 3.48E-03 | -1.189532 | CTDP1      | CTD phosph  | 9150      |
| ILMN_17610 | 3.89E-02 | 5.09E-03 | -2.435371 | FHOD3      | formin hon  | 80206     |
| ILMN_20850 | 3.32E-02 | 4.16E-03 | -1.780607 | SNX24      | sorting ne  | 28966     |
| ILMN_17580 | 3.93E-02 | 5.16E-03 | -1.965014 | CCNY       | cyclin Y    | 219771    |
| ILMN_21050 | 2.65E-02 | 3.13E-03 | 1.1206644 | TMEM220    | transmembr  | 388335    |
| ILMN_16840 | 2.66E-02 | 3.14E-03 | -1.053529 | AURKB      | aurora kir  | 9212      |
| ILMN_20510 | 2.72E-02 | 3.23E-03 | -1.10038  | DPRXP4     | divergent-  | 503645    |

|            |          |          |           |            |            |           |
|------------|----------|----------|-----------|------------|------------|-----------|
| ILMN_17305 | 3.77E-02 | 4.89E-03 | -3.016086 | CASP7      | caspase 7  | 840       |
| ILMN_22956 | 4.01E-02 | 5.29E-03 | -2.24831  | MAZ        | MYC associ | 4150      |
| ILMN_17936 | 2.92E-02 | 3.52E-03 | 1.441341  | ME3        | malic enzy | 10873     |
| ILMN_16695 | 4.10E-02 | 5.44E-03 | -2.838036 | BZW1       | basic leuc | 9689      |
| ILMN_17856 | 2.81E-02 | 3.36E-03 | 1.5653874 | PMP22      | peripheral | 5376      |
| ILMN_16711 | 2.63E-02 | 3.10E-03 | 1.2023168 | GPR68      | G protein- | 8111      |
| ILMN_17275 | 4.08E-02 | 5.41E-03 | -4.049797 | SULT2B1    | sulfotrans | 6820      |
| ILMN_17126 | 4.04E-02 | 5.34E-03 | 1.4171918 | ZNF829     | zinc finge | 374899    |
| ILMN_17449 | 2.80E-02 | 3.34E-03 | 1.1197532 | PTPRM      | protein ty | 5797      |
| ILMN_20626 | 2.78E-02 | 3.32E-03 | 1.0718493 | NMT2       | N-myristoy | 9397      |
| ILMN_16981 | 2.78E-02 | 3.32E-03 | -1.281863 | INCENP     | inner cent | 3619      |
| ILMN_32464 | 2.74E-02 | 3.26E-03 | 1.0476927 | LOC1001308 | uncharacte | 100130872 |
| ILMN_32399 | 2.73E-02 | 3.25E-03 | 1.5411731 | IDO1       | indoleamir | 3620      |
| ILMN_17089 | 2.79E-02 | 3.33E-03 | 1.0317711 | TMEM161A   | transmembr | 54929     |
| ILMN_16576 | 4.28E-02 | 5.74E-03 | -3.797678 | ZFHX4      | zinc finge | 79776     |
| ILMN_17155 | 3.00E-02 | 3.66E-03 | -1.013885 | ZC3H11A    | zinc finge | 9877      |
| ILMN_23852 | 2.96E-02 | 3.58E-03 | -1.26195  | PFKFB2     | 6-phosphof | 5208      |
| ILMN_17785 | 2.97E-02 | 3.60E-03 | 1.1330221 | WNT7A      | Wnt family | 7476      |
| ILMN_17195 | 3.97E-02 | 5.23E-03 | -2.38197  | C10orf67   | chromosome | 256815    |
| ILMN_20545 | 3.44E-02 | 4.35E-03 | -1.472229 | SMIM21     | small inte | 284274    |
| ILMN_16545 | 2.82E-02 | 3.38E-03 | 1.012705  | HAPLN3     | hyaluronar | 145864    |
| ILMN_17651 | 4.26E-02 | 5.72E-03 | -3.488454 | CST8       | cystatin 8 | 10047     |
| ILMN_17810 | 4.28E-02 | 5.74E-03 | -1.923888 | TSNARE1    | t-SNARE dc | 203062    |
| ILMN_23945 | 4.28E-02 | 5.75E-03 | -4.035499 | WNK3       | WNK lysine | 65267     |
| ILMN_17648 | 4.34E-02 | 5.85E-03 | -3.190675 | EML1       | echinodern | 2009      |
| ILMN_17916 | 3.01E-02 | 3.68E-03 | -1.004184 | KIAA0825   | KIAA0825   | 285600    |
| ILMN_16746 | 2.99E-02 | 3.64E-03 | -1.55854  | OLAH       | oleoyl-ACF | 55301     |
| ILMN_17355 | 4.47E-02 | 6.06E-03 | -3.015798 | PKD1L2     | polycystir | 114780    |
| ILMN_23471 | 3.79E-02 | 4.93E-03 | 1.4557798 | DCN        | decorin    | 1634      |
| ILMN_32146 | 2.98E-02 | 3.63E-03 | 1.1983562 | ZCCHC18    | zinc finge | 644353    |
| ILMN_33096 | 4.62E-02 | 6.32E-03 | -1.983769 | MIR181A2   | microRNA 1 | 406954    |
| ILMN_20535 | 4.60E-02 | 6.28E-03 | -3.689868 | KCNT2      | potassium  | 343450    |
| ILMN_32460 | 3.28E-02 | 4.09E-03 | -1.170906 | NCMAP      | non-compac | 400746    |
| ILMN_16708 | 3.30E-02 | 4.13E-03 | -1.074246 | ASB17      | ankyrin re | 127247    |
| ILMN_23391 | 4.72E-02 | 6.49E-03 | -1.764315 | HMGCLL1    | 3-hydroxyn | 54511     |
| ILMN_17511 | 3.45E-02 | 4.36E-03 | -4.974752 | CLDN14     | claudin 14 | 23562     |
| ILMN_16529 | 3.40E-02 | 4.29E-03 | -1.020204 | CLDN25     | claudin 25 | 644672    |
| ILMN_32445 | 4.66E-02 | 6.38E-03 | -1.772642 | ZSCAN23    | zinc finge | 222696    |
| ILMN_16837 | 3.73E-02 | 4.82E-03 | -1.419627 | LHX6       | LIM homeok | 26468     |
| ILMN_16805 | 3.18E-02 | 3.93E-03 | 1.0320366 | RTKN       | rhotekin   | 6242      |
| ILMN_17345 | 3.25E-02 | 4.05E-03 | 1.0621624 | RORC       | RAR relate | 6097      |
| ILMN_18091 | 3.17E-02 | 3.92E-03 | 1.0889088 | FAM118A    | family wit | 55007     |
| ILMN_17311 | 3.48E-02 | 4.42E-03 | -1.237954 | CR1        | complement | 1378      |
| ILMN_17187 | 4.50E-02 | 6.13E-03 | -1.55885  | XCL1       | X-C motif  | 6375      |
| ILMN_17627 | 3.22E-02 | 4.01E-03 | 1.0984544 | MAGED1     | MAGE famil | 9500      |
| ILMN_16902 | 3.20E-02 | 3.97E-03 | -1.338807 | BATF2      | basic leuc | 116071    |
| ILMN_16529 | 3.54E-02 | 4.52E-03 | -1.35     | NPIP3      | nuclear pc | 23117     |

|            |          |          |           |            |            |        |
|------------|----------|----------|-----------|------------|------------|--------|
| ILMN_17110 | 3.89E-02 | 5.09E-03 | -1.474844 | KCNB1      | potassium  | 3745   |
| ILMN_17485 | 3.55E-02 | 4.54E-03 | -1.047293 | GGT8P      | gamma-glut | 645367 |
| ILMN_17305 | 4.51E-02 | 6.14E-03 | -2.027604 | HLA-DPB2   | major hist | 3116   |
| ILMN_32397 | 3.25E-02 | 4.05E-03 | -1.021489 | DLGAP5     | DLG associ | 9787   |
| ILMN_18117 | 3.68E-02 | 4.75E-03 | -1.198311 | MYO7A      | myosin VII | 4647   |
| ILMN_16573 | 4.24E-02 | 5.68E-03 | -1.371519 | EPHA6      | EPH recept | 285220 |
| ILMN_21175 | 4.74E-02 | 6.53E-03 | -1.352755 | DPPA3      | developmer | 359787 |
| ILMN_22977 | 3.29E-02 | 4.11E-03 | -1.082822 | KCNMA1     | potassium  | 3778   |
| ILMN_33086 | 3.88E-02 | 5.07E-03 | 1.3675723 | MIR532     | microRNA 5 | 693124 |
| ILMN_16926 | 4.96E-02 | 6.91E-03 | -2.165258 | FMNL3      | formin lik | 91010  |
| ILMN_21861 | 3.38E-02 | 4.26E-03 | 1.1272454 | DGCR6      | DiGeorge s | 8214   |
| ILMN_20513 | 3.87E-02 | 5.05E-03 | -1.163416 | NEK2       | NIMA relat | 4751   |
| ILMN_16820 | 3.51E-02 | 4.47E-03 | -1.211873 | TNFAIP8L3  | TNF alpha  | 388121 |
| ILMN_16755 | 4.76E-02 | 6.56E-03 | -1.524269 | PRM1       | protamine  | 5619   |
| ILMN_16668 | 3.55E-02 | 4.54E-03 | -1.020367 | DACH1      | dachshund  | 1602   |
| ILMN_23687 | 4.28E-02 | 5.74E-03 | -1.924309 | CENPM      | centromere | 79019  |
| ILMN_18150 | 3.67E-02 | 4.73E-03 | 1.2634739 | PDGFRB     | platelet c | 5159   |
| ILMN_17167 | 3.49E-02 | 4.43E-03 | 1.083621  | MYO2       | myomesin 2 | 9172   |
| ILMN_17600 | 3.55E-02 | 4.54E-03 | -1.03682  | IFI44      | interferon | 10561  |
| ILMN_22822 | 4.72E-02 | 6.49E-03 | 1.2911114 | MLH3       | mutL homol | 27030  |
| ILMN_17777 | 3.69E-02 | 4.77E-03 | 1.1938843 | FIGNL2     | fidgetin l | 401720 |
| ILMN_17034 | 4.11E-02 | 5.46E-03 | 1.1270164 | ATP5I      | ATP synthe | 521    |
| ILMN_22100 | 4.69E-02 | 6.44E-03 | -4.724549 | DNAJC25-GM | DNAJC25-GM | 552891 |
| ILMN_16850 | 4.72E-02 | 6.49E-03 | 1.5023562 | FLRT1      | fibronecti | 23769  |
| ILMN_16902 | 4.15E-02 | 5.52E-03 | -1.285333 | BFSP2      | beaded fil | 8419   |
| ILMN_16570 | 4.72E-02 | 6.50E-03 | -1.271891 | B3GALNT1   | beta-1,3-N | 8706   |
| ILMN_32421 | 4.88E-02 | 6.77E-03 | 2.0706631 | KIR3DS1    | killer cel | 3813   |
| ILMN_17291 | 4.29E-02 | 5.76E-03 | 1.1445509 | GATM       | glycine an | 2628   |
| ILMN_17758 | 4.87E-02 | 6.75E-03 | -1.445841 | TM4SF20    | transmembr | 79853  |
| ILMN_16767 | 4.11E-02 | 5.46E-03 | 1.0270606 | WDR33      | WD repeat  | 55339  |
| ILMN_16530 | 4.20E-02 | 5.60E-03 | -1.091963 | HSD3B7     | hydroxy-de | 80270  |
| ILMN_17224 | 4.50E-02 | 6.11E-03 | -1.260081 | HRH2       | histamine  | 3274   |
| ILMN_17569 | 4.57E-02 | 6.22E-03 | -1.576798 | GBP6       | guanylate  | 163351 |
| ILMN_16637 | 4.04E-02 | 5.35E-03 | 1.0440636 | EPB41      | erythrocyt | 2035   |
| ILMN_17140 | 4.89E-02 | 6.79E-03 | -1.465208 | SLC9A5     | solute car | 6553   |
| ILMN_18764 | 4.85E-02 | 6.72E-03 | -1.476681 | MMP8       | matrix met | 4317   |
| ILMN_16759 | 4.60E-02 | 6.29E-03 | -1.10853  | ANKRD9     | ankyrin re | 122416 |
| ILMN_17901 | 4.83E-02 | 6.68E-03 | -1.092688 | HGF        | hepatocyte | 3082   |
| ILMN_17575 | 4.44E-02 | 6.01E-03 | 1.0121646 | USP40      | ubiquitin  | 55230  |
| ILMN_20825 | 4.49E-02 | 6.10E-03 | 1.2052853 | KIR3DL3    | killer cel | 115653 |
| ILMN_17332 | 4.81E-02 | 6.64E-03 | -1.007013 | TMIGD3     | transmembr | 57413  |
